# Supplementary material for: ‘Reducing Delays In Vaccination’ (REDIVAC) trial: a protocol for a randomised controlled trial of a web-based, individually tailored, educational intervention to improve timeliness of infant vaccination
Source: PubMed Central journal article supplement — BMJ Open. 2019 May 22;9(5):e027968. doi: 10.1136/bmjopen-2018-027968 (PMC6538084; doi:10.1136/bmjopen-2018-027968), 2019-05-22
Supplement: bmjopen-2018-027968.draft_revisions.pdf [file bmjopen-2018-027968.draft_revisions.pdf]

# BMJ Open

BMJ Open is committed to open peer review. As part of this commitment we make the peer review history of every article we publish publicly available.

When an article is published we post the peer reviewers' comments and the authors' responses online. We also post the versions of the paper that were used during peer review. These are the versions that the peer review comments apply to.

The versions of the paper that follow are the versions that were submitted during the peer review process. They are not the versions of record or the final published versions. They should not be cited or distributed as the published version of this manuscript.

BMJ Open is an open access journal and the full, final, typeset and author-corrected version of record of the manuscript is available on our site with no access controls, subscription charges or pay-per-view fees (<http://bmjopen.bmj.com>).

If you have any questions on BMJ Open's open peer review process please email [info.bmjopen@bmj.com](mailto:info.bmjopen@bmj.com)

# BMJ Open

**The “Reducing Delays In Vaccination” (REDIVAC) Trial: A protocol for a randomized controlled trial of a web-based, individually tailored, educational intervention to improve timeliness of infant vaccination**

|                               |                                                                                                                                                                                                                                                                                                                                                                                                                                                                                                                                                                                                                                                                                                                                                                                                                          |
|-------------------------------|--------------------------------------------------------------------------------------------------------------------------------------------------------------------------------------------------------------------------------------------------------------------------------------------------------------------------------------------------------------------------------------------------------------------------------------------------------------------------------------------------------------------------------------------------------------------------------------------------------------------------------------------------------------------------------------------------------------------------------------------------------------------------------------------------------------------------|
| Journal:                      | <i>BMJ Open</i>                                                                                                                                                                                                                                                                                                                                                                                                                                                                                                                                                                                                                                                                                                                                                                                                          |
| Manuscript ID                 | bmjopen-2018-027968                                                                                                                                                                                                                                                                                                                                                                                                                                                                                                                                                                                                                                                                                                                                                                                                      |
| Article Type:                 | Protocol                                                                                                                                                                                                                                                                                                                                                                                                                                                                                                                                                                                                                                                                                                                                                                                                                 |
| Date Submitted by the Author: | 16-Nov-2018                                                                                                                                                                                                                                                                                                                                                                                                                                                                                                                                                                                                                                                                                                                                                                                                              |
| Complete List of Authors:     | Dempsey, Amanda; University of Colorado Denver, USA,<br>Wagner, Nicole; Kaiser Permanente Colorado,, Institute for Health Research<br>Narwaney, Komal; Kaiser Permanente Colorado, Institute for Health Research<br>Pyrzanowski, Jennifer; University of Colorado Denver<br>Kwan, Bethany; University of Colorado School of Medicine, Family Medicine<br>Kraus, Courtney; Kaiser Permanente, Institute for Health Research<br>Gleason, Kathy; Kaiser Permanente Colorado , Institute for Health Research<br>Resnicow, Ken; University of Michigan, Health Education and Health Behavior<br>sevick, carter; University of Colorado Denver<br>Cataldi, Jessica; University of Colorado Denver<br>Brewer, Sarah; University of Colorado Denver<br>Glanz, Jason M; Kaiser Permanente Colorado, Institute for Health Research |
| Keywords:                     | immunization, mothers, vaccine hesitancy, randomized controlled trial                                                                                                                                                                                                                                                                                                                                                                                                                                                                                                                                                                                                                                                                                                                                                    |
|                               |                                                                                                                                                                                                                                                                                                                                                                                                                                                                                                                                                                                                                                                                                                                                                                                                                          |

SCHOLARONE™  
Manuscripts

1  
2  
3  
4  
5  
6                   **The “Reducing Delays in Vaccination” (REDIVAC) Trial: A protocol for a randomized**  
7  
8                   **controlled trial of a web-based, individually tailored, educational intervention to improve**  
9  
10                   **timeliness of infant vaccination**

11  
12  
13  
14                   Version 1.0, November 1, 2018  
15  
16  
17  
18  
19

20                   Amanda F. Dempsey<sup>1</sup> - [Amanda.dempsey@ucdenver.edu](mailto:Amanda.dempsey@ucdenver.edu)  
21  
22

23                   Nicole Wagner<sup>2</sup> - [Nicole.M.Wagner@kp.org](mailto:Nicole.M.Wagner@kp.org)  
24  
25

26                   Komal Narwaney<sup>2</sup> - [Komal.J.Narwaney@kp.org](mailto:Komal.J.Narwaney@kp.org)  
27  
28

29                   Jennifer Pyrzanowski<sup>1</sup> - [Jennifer.pyrzanowski@ucdenver.edu](mailto:Jennifer.pyrzanowski@ucdenver.edu)  
30  
31

32                   Bethany Kwan<sup>1</sup> - [BETHANY.KWAN@UCDENVER.EDU](mailto:BETHANY.KWAN@UCDENVER.EDU)  
33  
34  
35

36                   Courtney Kraus<sup>2</sup> - [Courtney.Kraus@kp.org](mailto:Courtney.Kraus@kp.org)  
37  
38

39                   Kathy Gleason<sup>2</sup> - [Kathy.s.Gleason@kp.org](mailto:Kathy.s.Gleason@kp.org)  
40  
41

42                   Kenneth Resnicow<sup>3</sup> - [kresnic@umich.edu](mailto:kresnic@umich.edu)  
43  
44

45                   Carter Sevick<sup>1</sup> - [CARTER.SEVICK@UCDENVER.EDU](mailto:CARTER.SEVICK@UCDENVER.EDU)  
46  
47

48                   Jessica Cataldi<sup>1</sup> - [Jessica.Cataldi@childrenscolorado.org](mailto:Jessica.Cataldi@childrenscolorado.org)  
49  
50

51                   Sarah Brewer<sup>1</sup> - [SARAH.BREWER@UCDENVER.EDU](mailto:SARAH.BREWER@UCDENVER.EDU)  
52  
53

54                   Jason Glanz<sup>2</sup> - [Jason.M.Glanz@kp.org](mailto:Jason.M.Glanz@kp.org)  
55  
56  
57  
58  
59  
60

1  
2  
3 Affiliations:  
4  
5

6 <sup>1</sup> Adult and Child Consortium for Outcomes Research and Delivery Science (ACCORDS),  
7

8  
9 University of Colorado Denver, Aurora, CO  
10

11  
12 <sup>2</sup> Kaiser Permanente Colorado Institute for Health Research, Denver CO  
13

14  
15 <sup>3</sup> School of Public Health, Division of Health Behavior and Health Education, University of  
16

17 Michigan, Ann Arbor, MI  
18  
19  
20  
21  
22

23  
24 Word Count: 4690  
25  
26  
27  
28  
29  
30  
31  
32  
33  
34  
35  
36  
37  
38  
39  
40  
41  
42  
43  
44  
45  
46  
47  
48  
49  
50  
51  
52  
53  
54  
55  
56  
57  
58  
59  
60

## Abstract

### Introduction:

Increasing numbers of children are failing to receive many recommended vaccines, which has led to significant outbreaks of vaccine preventable diseases in the US and worldwide. A major driver of undervaccination is parental vaccine hesitance. Prior research demonstrates that mothers are the primary decision maker for infant vaccination, and that their vaccination attitudes form primarily during pregnancy and early in their infant's life.

### Methods and Analysis:

This manuscript describes the protocol for an ongoing 3-armed, randomized controlled trial that aims to test the efficacy of provided tailored, individualized information via the internet to pregnant and new mothers versus untailored information versus usual care on the timeliness of infant vaccination. The primary outcome to be assessed is vaccination status, which is a dichotomous outcome (up to date versus not) assessed at 200 days of age, reflecting the time when infants should have completed the first set of vaccine provided (at age 2, 4 and 6 months). Infants with one or more age-appropriate recommended vaccines at least 30 days delayed are categorized as not up to date whereas all other infants are considered up to date. Secondary outcomes include vaccination status at 465 days, reflecting receive of recommended vaccines at 12-15 months of age, as well as vaccination attitudes, hesitancy and intention. Vaccination data will be derived from the electronic medical record and the state immunization registry. Other secondary outcomes will be assessed by online surveys.

1  
2  
3  
4  
5  
6 Ethics and Dissemination:  
7  
8

9 The study activities were approved by the Institutional Review Boards of the University of  
10 Colorado, Kaiser Permanente Colorado, and the University of Michigan. Results will be  
11  
12 disseminated through peer reviewed manuscripts and conference presentations.  
13  
14  
15  
16  
17  
18  
19  
20  
21  
22  
23  
24  
25  
26  
27  
28  
29  
30  
31  
32  
33  
34  
35  
36  
37  
38  
39  
40  
41  
42  
43  
44  
45  
46  
47  
48  
49  
50  
51  
52  
53  
54  
55  
56  
57  
58  
59  
60

1  
2  
3  
4  
5  
6 **Article Summary:**  
7

8  
9 **Strengths and Limitations of the Study:**  
10

- 11  
12 - **Strength:** Randomized, controlled trial design  
13  
14 - **Strength:** Population based sample  
15  
16 - **Strength:** Longitudinal analysis of EMR data  
17  
18 - **Limitation:** Only one geographic area limits generalizability  
19  
20  
21  
22  
23  
24  
25  
26  
27  
28

29 Trial Registration: This trial has been registered at ClinicalTrials.gov - NCT02665013.  
30  
31  
32  
33  
34  
35  
36  
37

38 Key words: vaccine hesitancy; immunization; mothers; clinical trial  
39  
40  
41  
42  
43  
44  
45  
46  
47  
48  
49  
50  
51  
52  
53  
54  
55  
56  
57  
58  
59  
60

## Introduction

Vaccination has been touted as one of the most effective public health interventions ever created.<sup>1</sup> Despite this, increasing numbers of parents choose to delay or forgo recommended vaccines for their children because of uncertainty about the vaccines' safety and necessity and general mistrust of the pharmaceutical industry.<sup>2,3</sup> With this, increasing numbers of children are failing to receive many recommended vaccines, which has led to significant outbreaks of vaccine preventable diseases in the US and worldwide.<sup>4,5</sup>

Developing and evaluating interventions to counteract parental vaccine hesitancy and childhood under-vaccination is a public health priority.<sup>6</sup> While many prior interventions have been tested, the majority have not been effective.<sup>7-9</sup> Addressing vaccine hesitancy can be difficult and time consuming because parents' vaccination decisions are often complex as they are heavily influenced by emotion, past experiences, and peers.<sup>10-12</sup> Addressing this complexity can be difficult for health care providers who attempt to persuade parents to vaccinate their children,<sup>13</sup> given that typical pediatric clinical encounters last only 15 to 20 minutes. As a result, even when parents only have a few questions that might be easily answered, a provider may feel "burnt out" when having to discuss vaccines with questioning parents.<sup>14</sup> In addition, in many cases the resistance to vaccination is related to psychosocial and political beliefs as much, or even more than, knowledge deficits.

Given this, new approaches to address vaccine hesitancy that are time efficient and address the complex factors influencing vaccine decision-making are needed.<sup>15</sup> One promising approach is



1  
2  
3 to use message tailoring to provide parents with information about vaccines that is customized  
4  
5 to their own personal needs *before* their child’s clinical appointments. Message tailoring allows  
6  
7 for written information to be individualized to reflect each person’s unique beliefs, experiences,  
8  
9 knowledge, attitudes, and barriers to action.<sup>16</sup> By doing so, the personal relevance of the  
10  
11 information increases which in turn improves individuals’ receptiveness to that information –  
12  
13 this is especially important in the case of vaccine hesitancy when the new information may not  
14  
15 align with a person’s current attitudes or beliefs.<sup>16</sup> This approach has been shown to be  
16  
17 effective for improving compliance with a number of health behaviors but only minimally  
18  
19 applied to vaccination.<sup>17,18</sup>

20  
21  
22  
23  
24  
25  
26  
27 This manuscript describes the protocol for a 3-armed randomized controlled trial testing the  
28  
29 effectiveness of a web-based tailored messaging intervention called “Vaccines and Your Baby”  
30  
31 (VAYB) versus an untailed version of the intervention versus usual care for improving timely  
32  
33 uptake of recommended childhood vaccines.  
34  
35  
36  
37  
38  
39  
40

#### 41 Conceptual Model

42  
43 The conceptual model for the intervention is based on a hybrid of the theory of planned  
44  
45 behavior (TPB) and the value-attitude-behavior hierarchy model (Figure 1).<sup>19,20</sup> It also  
46  
47 incorporates strategies derived from motivational interviewing and self-affirmation.<sup>21,22</sup>  
48  
49  
50 According to the TPB, behavior (in this case, following the recommended vaccination schedule)  
51  
52 is influenced by intentions (in this case, vaccine hesitancy), which are a result of attitudes  
53  
54 towards the behavior, perceived behavioral control, and norms. This intervention primarily  
55  
56  
57  
58  
59  
60

1  
2  
3 focuses on strategies for influencing attitudes – i.e., tailored messages addressing individual  
4 behavioral beliefs (e.g., beliefs that immunity is best achieved through exposure to a pathogen,  
5 or “natural immunity”) framed according to personal values (e.g., emphasizing the benefits of  
6 vaccination for preventing spread of illness among the young and elderly for those who value  
7 protecting one’s community). By affirming individual patient values and identity, addressing  
8 autonomy (Motivational interviewing and Self Determination Theory)<sup>21,23</sup> and constructing  
9 controlling tones of messages, this can minimize reactance and counterarguments. Individually  
10 tailored messages in general are known to have greater effects on attitude change than are  
11 universal (untailored) messages.<sup>20,24,25</sup> According to the value-attitude-behavior hierarchy  
12 model<sup>26</sup>, values influence attitudes and behavior across cultures and domains, including  
13 recycling, consumer behavior, and alcohol consumption.<sup>27,28</sup> This hybrid approach to  
14 establishing the conceptual model allows us to focus the intervention strategies on addressing a  
15 select set of known determinants of vaccine hesitancy and behavior, rather than incorporating  
16 the universe of behavior change techniques into our intervention.  
17  
18  
19  
20  
21  
22  
23  
24  
25  
26  
27  
28  
29  
30  
31  
32  
33  
34  
35  
36  
37  
38  
39  
40

### 41 **Aim and Hypothesis**

42  
43 The primary aim of this study is to conduct a three-group randomized, intervention trial to  
44 measure the effectiveness of the VAYB intervention versus a similarly constructed but  
45 untailored intervention versus usual care on vaccination receipt and timeliness during an  
46 infant’s first 15 months of life. Our intervention approach (the VAYB intervention) is novel in  
47 that it combines values framing with message tailoring for vaccination to change parents’  
48 attitudes and behavior. The primary hypothesis to be tested is that infants of mothers who  
49  
50  
51  
52  
53  
54  
55  
56  
57  
58  
59  
60

1  
2  
3 receive values-framed, individually tailored messages (e.g. the VAYB intervention) will have  
4  
5 lower levels of vaccine hesitancy and more up to date vaccination behavior than those receiving  
6  
7 an untailored version of the intervention or those receiving usual care. A secondary aim of the  
8  
9 project is to assess the impact of the intervention on vaccination attitudes and hesitancy level,  
10  
11 particularly as these relate to our conceptual model described above.  
12  
13  
14  
15  
16  
17  
18

## 19 **Methods**

20  
21  
22 A summary of the trial's specifications is shown in Table 1.  
23  
24  
25  
26  
27

### 28 **Study Design and Registration**

29  
30  
31 This is a 3-armed, individually randomized clinical trial with longitudinal follow up. Study arms  
32  
33 include 1) the VAYB (tailored) intervention, 2) an untailored version of the intervention and 3)  
34  
35 usual care. Participants are active in the study from the time of enrollment until their infant  
36  
37 reaches 15 months of age (489 days). The primary vaccination outcome to be assessed for the  
38  
39 study (average number of days under vaccinated for all vaccinations in the recommended  
40  
41 vaccine schedule) occurs when the infant is 200 days old. Secondary vaccination outcomes and  
42  
43 outcomes related to attitudes and hesitancy are assessed at 489 days of age. This time period  
44  
45 was chosen to encompass three critical decision making points associated with the vaccination  
46  
47 process; 1) during pregnancy when many vaccination decisions and attitudes are being  
48  
49 formed;<sup>29,30</sup> 2) during the time period that corresponds to the ages when the initial infant series  
50  
51  
52  
53  
54  
55  
56  
57  
58  
59  
60

1  
2  
3 is recommended (generally at ages 2, 4 and 6 months); and 3) during the second stage of the  
4  
5 infant vaccination series at age 12-15 months when vaccines different from those offered at the  
6  
7 initial stage are introduced. The primary outcome (vaccination behavior) is assessed using data  
8  
9 from the electronic medical record, augmented with data from the Colorado immunization  
10  
11 registry, CIIS. The study is registered with ClinicalTrials.gov (NCT02665013, see Table 1 for  
12  
13 details).  
14  
15  
16  
17  
18  
19  
20  
21

## 22 Study Setting

23  
24 The study takes place via the internet. Participants in the VAYB and untailed arms view  
25  
26 educational materials on a web-enabled device or computer of their own and are prompted to  
27  
28 view this information again at specific time points during the study (described below).  
29  
30

31  
32 Participants enrolled in the usual care arm receive by mail Vaccine Information Statements (VIS)  
33  
34 for all recommended vaccines in the child's first year of life; VISs are not provided by mail to  
35  
36 participants in the VAYB or untailed arms. Participants in all arms complete surveys at  
37  
38 baseline, and three additional time points (Table 2). The infants of participants in all arms  
39  
40 receive care at participating clinics (an eligibility criterion, see below) where VISs are provided  
41  
42 to all study groups as part of routine care.  
43  
44  
45  
46  
47  
48  
49

## 50 Study Population and Inclusion/Exclusion Criteria

51  
52  
53  
54  
55  
56  
57  
58  
59  
60

1  
2  
3 Women in the third trimester of pregnancy enrolled at Kaiser Permanente Colorado (KPCO)  
4 between April 2016 and October 2017 are recruited for the trial. KPCO is a nonprofit, managed  
5 care organization serving ~667,000 individuals. Each year ~5,000 pregnant women and 140,000  
6 children receive health care at KPCO clinics. Study participants can enroll from the first  
7 recruitment outreach that occurs in the last trimester of pregnancy to when their infant is  $\leq 2$   
8 months of age. The infant must be enrolled in the KPCO health plan to continue participation in  
9 the study.  
10  
11  
12  
13  
14  
15  
16  
17  
18  
19  
20  
21  
22  
23

24 A combination of electronic medical record (EMR) data and study screening questions are used  
25 to determine study eligibility. First, the EMR is used to identify English speaking women,  
26 currently enrolled at KPCO, and  $\geq 18$  years of age in the last trimester of pregnancy, based on  
27 clinically determined expected delivery date. All identified women with a diagnosis (ICD10)  
28 code in the past 8 months indicating potential abortion, miscarriage, adoption, fetal anomalies,  
29 or genetic disorders in the pregnancy, or a high risk maternal condition (i.e. cancer) are flagged  
30 for potential exclusion. Medical chart reviews are conducted on these women and they are  
31 definitively excluded as potential participants if the EMR indicates their fetus has a high-risk  
32 condition (e.g., fatal heart condition, trisomy 18, anencephaly), or they have a spontaneous or  
33 elective abortion, social issues (such as domestic violence), or serious health concerns.  
34  
35  
36  
37  
38  
39  
40  
41  
42  
43  
44  
45  
46  
47

48 Screening questions are delivered online before consent to ensure participants plan to use  
49 KPCO medical care for their child, are  $\geq 18$  years of age, and are currently pregnant or have a  
50 child less than 2 months of age. During the course of the study, participants are removed if  
51 they have a fetal demise, infant death, if the infant loses KPCO insurance coverage for greater  
52  
53  
54  
55  
56  
57  
58  
59  
60

1  
2  
3 than 90 days, if they request to be removed from the study or if they die. This data is obtained  
4  
5 from a monthly data extraction from the EMR and patient report.  
6  
7  
8  
9  
10

## 11 Consent and Recruitment

12  
13  
14  
15 Recruitment occurs via a multistep process. After the EMR is used to screen for initial eligibility,  
16  
17 a series of 2 letters, 3 emails, and one phone call are sent to potential participants 1-2 weeks  
18  
19 apart to direct patients to the KPCO study registration website created specifically for this  
20  
21 study. On this registration website identity and eligibility are confirmed, and the participant is  
22  
23 consented by signing an online form.  
24  
25  
26  
27  
28  
29  
30

31 After consent participants are directed to the *study* website where they set up login  
32  
33 information and are provided with a Pre-intervention Questionnaire that assesses their baseline  
34  
35 intention to vaccinate, vaccination values, logistical barriers to vaccination, vaccine hesitancy  
36  
37 (used for randomization), and demographics, and re-confirms eligibility. Previously developed  
38  
39 and validated measures are used to assess these items.<sup>31-33</sup> Upon completion of this  
40  
41 questionnaire, participants are considered to be “enrolled” in the study and are randomized  
42  
43 (described below). The screening, consent and enrollment process is repeated monthly until  
44  
45 the target sample size is reached.  
46  
47  
48  
49  
50  
51  
52  
53

## 54 Assignment of Interventions

1  
2  
3 Participants are randomized on a 1:1:1 basis between the VAYB, untailored and usual care  
4  
5 arms. The allocation assignment is generated by back-end software embedded in the study  
6  
7 website. Randomization occurs immediately following enrollment into the study (i.e. after  
8  
9 completion of the pre-intervention questionnaire) and remains in place throughout the study.  
10  
11 Stratified randomization along with a permuted block technique is used such that participants  
12  
13 are first stratified into either a hesitant or non-hesitant group, based on responses to the pre-  
14  
15 intervention questionnaire. Participants from each group are then added to their own set of  
16  
17 blocks that each contain 6. There are 2 slots available for each of the 3 study arms. These slots  
18  
19 are randomly ordered when the block is created. When all 6 slots are filled, a new block with 6  
20  
21 randomly ordered slots is added.  
22  
23  
24  
25  
26  
27  
28  
29  
30

### 31 Blinding

32  
33  
34 Participants are not informed about which study arm they are assigned to but all three study  
35  
36 arms they could potentially be assigned to are described in the study consent documents. Thus,  
37  
38 although they are not told specifically which arm they are in, they are not blinded to their study  
39  
40 assignment. The project manager for the study will convert study data to unlabeled arms (i.e.  
41  
42 arm 1, 2 or 3) allowing for the rest of the study team to be blinded to study arm assignment  
43  
44 during the analysis and data interpretation phases of the project. Unblinding will occur when  
45  
46 data analysis is complete for the primary study outcome. Clinics where participants receive  
47  
48 care are not aware of the individuals participating in the study unless brought up by the patient  
49  
50 during a clinical encounter.  
51  
52  
53  
54  
55  
56  
57  
58  
59  
60

## Sample Size Calculation

To detect an odds ratio between 2.0 and 3.0 for up-to-date vaccination status between the intervention study arms and usual care, we estimate a needed sample size of 477 to 1002 participants. This sample size is based on an assumption of 15% of the recruited population being vaccine hesitant, a 1:1:1 randomization allocation ratio, two-sided tests of statistical significance, 80% statistical power, and a 5% type I error rate. Accounting for an attrition of 15%, we need to enroll 561 to 1179 participants.

## Interventions

### Tailored Intervention

In the VAYB arm messages were tailored for multiple constructs including intention to vaccinate, personal attitudes about vaccines, vaccination values (Table 2), vaccination beliefs and concerns, logistical barriers to vaccination, and child's name, sex and birthday. Data to inform this initial tailoring come from the Pre-Intervention Questionnaire. Interim questionnaires are used to refresh the tailored information at 3 times during the study period. Tailoring occurs based on an embedded algorithm that is part of the VAYB website. An in-depth description of the process used to develop the VAYB intervention, and the resulting content, is described in detail elsewhere but examples are provided in Table 3.<sup>32,33</sup>



1  
2  
3 Upon completion of the pre-intervention questionnaire where initial tailoring information is  
4  
5 obtained, participants are automatically directed to the VAYB website which is individually  
6  
7 customized based on their responses. The most highly tailored content is in three “Just for  
8  
9 You” tiles that are displayed prominently on the page (Figure 2A). These tiles reflect the top  
10  
11 three vaccine topics of concern that each participant indicates they want more information  
12  
13 about and are further customized to highlight the vaccination values the participant most  
14  
15 endorses, and to reflect their most recently reported intention to vaccinate. The remaining  
16  
17 content is lightly tailored to reflect participant’s attitudes, concerns, hesitancy and  
18  
19 demographics, but is not tailored based on vaccination values. Highlighted text on the home  
20  
21 page (Figure 2A) is used to further identify additional information that is most relevant to the  
22  
23 participant based on their survey answers. The website is refreshed 3 times during the course  
24  
25 of the study based on interim assessments of participants’ attitudes, beliefs, concerns, values  
26  
27 and vaccine hesitancy. Specifically, when the infant is 4 to 6 months of age, participants re-  
28  
29 answer all questions excluding the value items and questions used to assess vaccine hesitancy,  
30  
31 and the content is refreshed accordingly. Values are reassessed again in a 3rd survey when the  
32  
33 infant is 10 to 12 months and the website is refreshed to reflect any new content. Vaccine  
34  
35 hesitancy level is reassessed at a 4<sup>th</sup> survey and the content is again refreshed. Participants  
36  
37 receive a gift card after each survey is completed. For all time points, vaccination intention is  
38  
39 assessed immediately before and within the hour after viewing the website content (VAYB and  
40  
41 untailored arms). A reminder for this vaccination intention assessment is sent to non-  
42  
43 responders after one day.  
44  
45  
46  
47  
48  
49  
50  
51  
52  
53  
54  
55  
56  
57  
58  
59  
60

## Untailored Intervention

To isolate the impact that message tailoring has on mothers' vaccination attitudes and behavior, the primary comparator group in the study is a website that is similarly constructed as the VAYB website but lacks tailored elements. Specifically, the untailored intervention has similar text, content and design as the VAYB intervention, but is not linked to survey responses to make the messages individually customized (Figure 2B). This means that each participant in this arm receives identical content, messages, text and images. For example, instead of name-tailoring, the text uses generic references such as "you" and "your child". The recommended vaccine schedule is static in the untailored site compared to the tailored site which highlights upcoming vaccines based on the child's age. The order of content displayed is fixed throughout the study period as there is no linkage of the website's text to participants' values or attitudes. In addition, the highly tailored "Just for You" tiles are not present in the untailored intervention. The same questionnaires administered to participants in the VAYB arm are administered to participants in the untailored arm, but the material is not used to refresh the website content

## Usual Care

After taking the Pre-Intervention Questionnaire that is used to determine randomization, participants in the usual care arm are thanked for their information and logged off the study website. They receive an email containing their gift card and are mailed the Vaccine Information Statements for the vaccines due in the child's first year of life. They do not have access to the VAYB or untailored websites used for the other arms of the study but do receive

1  
2  
3 the same interim questionnaires at the same time periods as the VAYB and untailed arms  
4  
5 (see Table 2). They continue their usual care and their infant's vaccination status is assessed  
6  
7 prospectively when their child turns 200 days old (primary outcome) and again when their child  
8  
9 is age 489 days (secondary outcome).  
10  
11  
12  
13  
14

15 Routine pediatric care is available to infants of all participants in the study. At KPCO, usual care  
16  
17 typically consists of a series of pediatric, well-child care visits at 2 weeks, 2 months, 4 months, 6  
18  
19 months, and 12 months of age, with an optional visit at 9 months of age if desired by the  
20  
21 healthcare provider or parent. Visit content is structured based on the Bright Futures program  
22  
23 of American Academy of Pediatrics, which provides detailed guidelines regarding the content  
24  
25 and schedule of pediatric health supervision visits.<sup>34</sup> The visit content is intentionally broad,  
26  
27 with visits focused on the needs of the child and family that typically last 20 minutes or less.  
28  
29  
30 Based on data in the EHR, a pre-visit informational sheet lists the vaccines recommended at  
31  
32 that visit. Parents are also provided with the VISs relevant to that visit. Providers are often  
33  
34 asked about vaccination, and can provide additional information verbally, although the small  
35  
36 window of time available for visits can limit discussion.  
37  
38  
39  
40  
41  
42  
43  
44

## 45 Outcomes

46  
47  
48 The primary outcome of the study is a dichotomous categorization of vaccination status (up-to-  
49  
50 date vs. not up-to-date) that is defined based on a continuous measure of days under-  
51  
52 vaccinated. This outcome is assessed at 200 days of age to cover a majority of the initial infant  
53  
54 vaccination series and to minimize the loss to follow-up. The following 6 vaccines  
55  
56  
57  
58  
59  
60

1  
2  
3 recommended by the Advisory Committee on Immunization Practices will be assessed: hepatitis  
4  
5 B; rotavirus; diphtheria-tetanus-acellular pertussis; Haemophilus influenzae type b;  
6  
7 pneumococcal conjugate vaccine; and polio. All vaccination data is obtained from KPCO's EMR  
8  
9  
10  
11 CIIS.

12  
13  
14  
15  
16  
17 To categorize vaccination status we will first assess the number of days under-vaccinated, by  
18  
19 calculating the difference between when a vaccine dose was actually administered and when a  
20  
21 vaccine dose should have been administered according to the vaccination schedule  
22  
23 recommended by the Advisory Committee on Immunization Practices,<sup>35</sup> plus an additional 30  
24  
25 day "leeway" to account for vaccination that did not occur at exactly the minimal interval  
26  
27 between doses. For example, the first dose of rotavirus vaccine is due at age 2 months (61 days)  
28  
29 but is not considered late until age 92 days. Days undervaccinated for this dose begin accruing  
30  
31 on day 93. The number of days under-vaccinated is then summed across all doses and vaccines  
32  
33 to calculate a total number of days under-vaccinated for each infant and can range from 0-648  
34  
35 days. Infants with 0 total days undervaccinated at 200 days will be considered up-to-date on  
36  
37 their vaccination status; Those with  $\geq 1$  days undervaccinated (representing at least a 30-day  
38  
39 delay for at least 1 vaccine) will be considered not up-to-date.  
40  
41  
42  
43  
44  
45  
46  
47  
48  
49

50 A secondary vaccination metric that is assessed is up-to-date status for measles-mumps-rubella  
51  
52 (MMR) and varicella vaccine at 489 days, when delay for the first dose of these vaccines begins.  
53  
54 This metric is useful because it incorporates outcomes related to parents' decision-making  
55  
56  
57  
58  
59  
60

1  
2  
3 about these two vaccines recommended at 12-15 months of age that are not offered  
4  
5  
6 previously.  
7  
8  
9

10 The interventions' impact over time on a variety of additional secondary outcomes that are  
11 based on the constructs of our conceptual behavioral model (Figure 1) and assessed as part of  
12 the baseline and interim questionnaires will also be assessed. These include changes over time  
13 in vaccination attitudes and hesitancy, and how these relate to study arm, vaccination values,  
14 and vaccination status. Vaccination attitudes are assessed using measures previously developed  
15 by our team and others,<sup>31</sup> values are assessed using a novel vaccination values framework we  
16 have developed (manuscript in preparation), and vaccine hesitancy is assessed using a 5-item  
17 validated measure developed by (Opel, personal communication). A variety of covariates and  
18 potential moderators will be assessed as part of this analysis including patient age, gender and  
19 insurance (some patients have Medicaid KPCO coverage), and mother's age, race, and ethnicity.  
20  
21  
22  
23  
24  
25  
26  
27  
28  
29  
30  
31  
32  
33  
34  
35  
36  
37  
38  
39  
40  
41  
42  
43  
44  
45  
46  
47  
48  
49  
50  
51  
52  
53  
54  
55  
56  
57  
58  
59  
60

### **Data Collection Methods**

Vaccination data is collected routinely as part of clinical care within the KPCO health system and will be assessed from the KPCO EMR data warehouse at pre-defined ages (200 days and 489 days). CIIS will be used as a secondary vaccination data source, though internal audits demonstrate that >95% of childhood vaccines given to KPCO patients are captured within the EMR. Survey data are collected on the internet based on user responses to the online questionnaires.

## Participant retention

To assist with retention, participants receive a \$20 gift card incentive for each survey they complete. However, even with this incentive we expect some drop off in survey participation. Because our primary outcome is vaccination status, mothers who do not participate in all the study surveys are still able to have the primary study outcome assessed, so long as their child maintains coverage and continues to seek care within the KPCO health system. Based on past studies, we expect that the proportion of mothers who discontinue KPCO coverage after the birth of their infant to be ~15%, and our study is powered with this attrition in mind.<sup>36</sup>

## Data security and storage

To ensure that the data are protected, several methods are used. Personal identifying data collected on study websites is limited to a participant generated username, email address, and child birthdate. The only other data collected on the study websites are vaccine attitudes, beliefs, values and demographics. The study websites use virtualized servers housed at redundant data centers and access is password protected. Virtual servers are backed up automatically onto encrypted tape for recovery and security. Data provided to researchers from the website are encrypted if they are transmitted across the Internet. Data use agreements are in place across all study team member sites.

1  
2  
3 All medical record data are collected and stored at KPCO behind the firewall in secure password  
4  
5 protected files. This dataset is linked to a study ID. A limited dataset devoid of personal  
6  
7 identifying information will be used for data analyses. Data will be shared with study team  
8  
9 members through a secure file transfer. Only members of KPCO research project team have  
10  
11 access to the personal identifiers linking the study IDs to specific study participants.  
12  
13  
14  
15  
16  
17  
18  
19  
20  
21

## 22 **Statistical Methods**

23  
24 Total days undervaccinated will be analyzed primarily as a dichotomous variable (up-to-date  
25  
26 vaccination status) and secondarily as a continuous measure. Categorically defined up-to-date  
27  
28 vaccination status will be analyzed using logistic regression to estimate odds ratios and  
29  
30 associated 95% confidence intervals. For the continuous measure, because total days  
31  
32 undervaccinated has a highly skewed distribution, we will use a nonparametric analysis and a  
33  
34 rank transformation approach. For both measures, we will conduct analyses stratified by  
35  
36 baseline vaccine hesitancy.  
37  
38  
39  
40  
41  
42  
43  
44

45 For survey measures, descriptive statistics will be assessed and changes in vaccination attitudes  
46  
47 and intention over time will be calculated. All measures are assessed using Likert scales and  
48  
49 will be analyzed as linear measures. Repeated measures ANOVA will be used to assess the  
50  
51 intervention's impact on these outcomes. Mixed linear models will be used to assess the  
52  
53  
54  
55  
56  
57  
58  
59  
60

1  
2  
3 “difference in difference” over time among these outcomes, by arm, controlling for the  
4  
5  
6 covariates described above.  
7  
8  
9

## 10 11 12 Analytic framework

13  
14  
15 We will use a modified intention to treat framework for the analysis of vaccination outcomes.  
16  
17 This analytic cohort will include infants of all randomized mothers who maintained KPCO health  
18  
19 coverage for the allotted amount of time (200 days for the primary outcome, 489 days for the  
20  
21 secondary outcome) with no more than 90 days of no coverage, and thus have vaccination data  
22  
23 available for assessment. For survey outcomes, we will use a modified intention to treat  
24  
25 analysis that includes all participants with data from at least one non-baseline questionnaire.  
26  
27  
28  
29  
30  
31  
32

## 33 34 Missing data

35  
36 As described above, nearly all vaccines provided to KPCO patients are documented in the EMR,  
37  
38 and doses provided outside KPCO are documented in CIIS. Therefore, we expect there to be  
39  
40 minimal missing data for vaccination outcomes. To ensure the most complete record, CIIS will  
41  
42 be cross checked for all participants to identify any vaccine doses given to infants outside the  
43  
44 KPCO system that are missing from the KPCO EMR. Participants who do not have vaccination  
45  
46 data present in either system will be assumed to have not gotten a vaccine dose elsewhere.  
47  
48  
49  
50  
51  
52  
53  
54  
55  
56  
57  
58  
59  
60



1  
2  
3 For survey data, due to our recruitment strategy, we anticipate no missing data at baseline, as  
4 completion of the baseline survey was a criterion for entry into the study. However, there may  
5  
6 be missing data for subsequent surveys as these were not required to remain in the study. For  
7  
8 missing data in surveys beyond baseline, multiple imputation models will be developed for  
9  
10 analyses involving multiple survey points where greater than 10% of subjects would be lost due  
11  
12 to missing values.  
13  
14  
15  
16  
17  
18  
19  
20  
21

## 22 Subgroup analyses

23  
24 The main subgroup analysis planned is examining the efficacy of our intervention by vaccine  
25  
26 hesitancy status (dichotomous variable), as defined by the 5 item Opel measure described  
27  
28 above.  
29  
30  
31  
32  
33  
34  
35

## 36 Monitoring

37  
38 KPCO EMR data on participants and their infants will be used to identify any deaths or loss of  
39  
40 KPO insurance coverage, which are subsequently chart reviewed for accuracy. Participants who  
41  
42 die or experienced an infant death, or have >90 days loss of insurance coverage, will be  
43  
44 removed from the study and will not be included in the modified intention to treat analysis. All  
45  
46 participants will be monitored weekly for completion of the various surveys in the study and  
47  
48 reminder emails will be sent on a pre-set schedule to those who have not completed them.  
49  
50  
51  
52  
53  
54  
55  
56  
57  
58  
59  
60

1  
2  
3 However, failure to complete any surveys beyond the baseline survey will not be cause for  
4  
5 removal from the study.  
6  
7  
8  
9

## 10 11 12 Assessment of Harms and AEs 13

14  
15 Study participants are provided with contact information for the research team and encouraged  
16  
17 to contact the team if they experience any adverse events related to their participation in the  
18  
19 study (e.g. being contacted after an infant death). Adverse events are expected to be very  
20  
21 unlikely given the nature of the study and our monitoring procedures. However, should any  
22  
23 significant adverse events occur, they will be reported to the appropriate institutional  
24  
25 authorities.  
26  
27  
28  
29  
30  
31  
32

## 33 34 Ethics and Dissemination 35

### 36 37 Approvals 38

39  
40 This study is approved by the Institutional Review Boards at the University of Colorado, and  
41  
42 KPCO.  
43  
44  
45  
46  
47

### 48 49 Informed consent 50

51  
52 All mothers in the study are informed about the study, the risks and benefits and provide  
53  
54 written informed consent via an on-line registration process prior to participating in the study.  
55  
56  
57  
58  
59  
60

1  
2  
3 As part of the consent process participants are informed that they may withdraw from the  
4  
5 study at any time without impacting their clinical treatment.  
6  
7  
8  
9  
10

#### 11 Access to data

12  
13  
14  
15 The data will be accessed only by authorized persons directly involved in the study from the  
16  
17 University of Colorado Denver, KPCO and University of Michigan. Access to a de-identified,  
18  
19 aggregated version of the dataset and analysis code will be available upon request and approval  
20  
21 of the study team  
22  
23  
24  
25  
26  
27

#### 28 Competing Financial Interests

29  
30  
31 Amanda Dempsey serves on advisory boards for Merck, Pfizer, and Sanofi and as a consultant  
32  
33 for Pfizer. She does not receive any research funding from these companies and they played no  
34  
35 role in this project. All other research team members have no competing financial interests to  
36  
37 declare.  
38  
39  
40  
41  
42  
43  
44

#### 45 Dissemination Plans

46  
47  
48 Results of the study will be presented at national and international research conferences and  
49  
50 through peer-reviewed publications. Any changes to the study protocol will be clearly  
51  
52 communicated to journals publishing the study results in a manner that aligns with the journal's  
53  
54 policies for reporting clinical trials. CONSORT guidelines will be followed when reporting study  
55  
56  
57  
58  
59  
60

1  
2  
3 outcomes. Study materials such as questionnaires and screenshots of the intervention  
4  
5 websites will be available to researchers upon request from the study Principal Investigators. If  
6  
7 the VAYB intervention proves to be efficacious in reducing delays in the timeliness of infant  
8  
9 vaccination, the study team will work with web-developers and community organizations to  
10  
11 explore options to make the website available to the general public.  
12  
13  
14  
15  
16  
17  
18

### 19 Patient and Public Involvement

20  
21  
22 Patients were first involved in this research when designing the intervention, which is informed  
23  
24 by the literature, and by the research teams prior clinical and research experience. The bulk of  
25  
26 patient involvement was as research participants. They will not be involved in recruitment or  
27  
28 conduct of the study, data analysis, or dissemination.  
29  
30  
31  
32  
33  
34  
35  
36  
37  
38  
39  
40  
41  
42  
43  
44  
45  
46  
47  
48  
49  
50  
51  
52  
53  
54  
55  
56  
57  
58  
59  
60

### Figure Legends

Figure 2: The right arrow denotes the “Just for You” tiles that represent the most highly tailored content on the VAYB website. The left arrow denotes additional text reflecting lightly tailored material that is particularly salient to the participant based on their survey responses.

For peer review only

Table 1. Trial Registration Dataset Summary Table

| Data Category                        | Information                                                                                                                                                                                                                                                                                                                                                                                      |
|--------------------------------------|--------------------------------------------------------------------------------------------------------------------------------------------------------------------------------------------------------------------------------------------------------------------------------------------------------------------------------------------------------------------------------------------------|
| Registry and trial number            | ClinicalTrials.gov - NCT02665013                                                                                                                                                                                                                                                                                                                                                                 |
| Data of registration                 | 1/4/2016                                                                                                                                                                                                                                                                                                                                                                                         |
| Secondary identifying numbers        | CO-IRB #: CO-15-2299_07                                                                                                                                                                                                                                                                                                                                                                          |
| Financial Support                    | National Institutes of Health                                                                                                                                                                                                                                                                                                                                                                    |
| Contact for queries                  | <a href="mailto:Amanda.dempsey@ucdenver.edu">Amanda.dempsey@ucdenver.edu</a>                                                                                                                                                                                                                                                                                                                     |
| Title                                | The REDIVAC study-Reducing Delay in the Vaccination of Children                                                                                                                                                                                                                                                                                                                                  |
| Countries of Recruitment             | United States                                                                                                                                                                                                                                                                                                                                                                                    |
| Health condition studied             | Infant vaccination                                                                                                                                                                                                                                                                                                                                                                               |
| Interventions                        | Active comparator – tailored educational website<br>Placebo comparator – untailored educational website<br>Passive comparator – usual care                                                                                                                                                                                                                                                       |
| Key inclusion and exclusion criteria | <u>Inclusion</u> : ≥18 years, pregnant in 3 <sup>rd</sup> trimester or child <2 months of age, receives care at KPCO health system, able to read English, access to the internet.<br><u>Exclusion</u> : high risk maternal or fetal health condition, maternal social issues (such as abuse), fetal or infant death, does not plan to have infant receive care in KPCO health system after birth |

|                          |                                                                          |
|--------------------------|--------------------------------------------------------------------------|
| Study type               | Individually randomized, controlled trial                                |
| Date of first enrollment | 4/20/2016                                                                |
| Target sample size       | 700                                                                      |
| Trial status             | Ongoing data collection                                                  |
| Primary outcomes         | Average days undervaccinated;<br>Up to date vaccination status           |
| Key Secondary Outcomes   | Vaccination attitudes;<br>Vaccination values;<br>Vaccine hesitancy level |

**Table 2. Timing and Content of Study Questionnaires**

| Timing                                                | Rationale                                                                                                                                                                                                                                                   | Content                                                                                                                                  |
|-------------------------------------------------------|-------------------------------------------------------------------------------------------------------------------------------------------------------------------------------------------------------------------------------------------------------------|------------------------------------------------------------------------------------------------------------------------------------------|
| Last trimester of pregnancy or child <2 months of age | Pre-intervention questionnaire required for study enrollment. Our prior research indicates infant vaccination decisions are actively forming among expectant mothers.                                                                                       | Intention to vaccinate<br>Vaccination values<br>Vaccination attitudes<br>Logistical barriers<br>Vaccine hesitancy status<br>Demographics |
| At child age 4 to 6 months                            | First round of infant vaccines is typically provided at age 2, 4 and 6 months. The same vaccines are given at each visit.                                                                                                                                   | Intention to vaccinate<br>Vaccination attitudes<br>Logistical barriers<br>Vaccine hesitancy (only 3 of 5 Qs)                             |
| At child age 10 – 12 months                           | The same vaccines are provided at 2, 4 and 6 months of age, thus decisions made at the two-month visit are likely to be followed for 4 and 6-month vaccines. However, several new vaccines are introduced at the 1-year visit. Vaccine-hesitant parents are | Intention to vaccinate<br>Vaccination values<br>Vaccination attitudes<br>Logistical barriers<br>Vaccine hesitancy status                 |



1  
2  
3  
4  
5  
6  
7  
8  
9  
10  
11  
12  
13  
14  
15  
16  
17  
18  
19  
20  
21  
22  
23  
24  
25  
26  
27  
28  
29  
30  
31  
32  
33  
34  
35  
36  
37  
38  
39  
40  
41  
42  
43  
44  
45  
46  
47  
48  
49  
50  
51  
52  
53  
54  
55  
56  
57  
58  
59  
60

|                  |                                                                                                            |                                                                                |
|------------------|------------------------------------------------------------------------------------------------------------|--------------------------------------------------------------------------------|
|                  | likely to need additional, new information for making decisions about the vaccines provided at age 1 year. |                                                                                |
| Age 13-15 months | End of study assessment to track changes over crucial time periods of vaccine decision-making              | Vaccination attitudes<br>Vaccine hesitancy status<br>Satisfaction with website |

Table 3 Examples of VAYB Website Content for Two Topics, Showing Tailoring Based on Three Different Values

| <b>Vaccines and Your Baby: Tailored Messages</b> |                                                                                                                                                                                                                                                                                            |                                                                                                                  |
|--------------------------------------------------|--------------------------------------------------------------------------------------------------------------------------------------------------------------------------------------------------------------------------------------------------------------------------------------------|------------------------------------------------------------------------------------------------------------------|
| <b>Value</b>                                     | <b>Topics</b>                                                                                                                                                                                                                                                                              |                                                                                                                  |
|                                                  | <b>“Alternative /Delayed Vaccine Schedules” Message</b>                                                                                                                                                                                                                                    | <b>“Doing your own Research on Vaccines” Message</b>                                                             |
| <b>Security – Disease Prevention</b>             | Like many parents, your main goal is to keep your child healthy. The last thing you want is for your child to get an illness you could have prevented with a simple vaccine.                                                                                                               | You're the kind of person who will do everything she can to protect her baby from illnesses.                     |
| <b>Self-Direction</b>                            | You're not one to just do what other people tell you to do. You know your child better than anyone, and you have choices to make. You want to do your own research about vaccines. You don't want him/her to get a disease. But you don't want to put him/her at risk by getting vaccines. | You're the kind of person who plays an active role in decisions about her baby's health.                         |
| <b>Security – Vaccine Risk</b>                   | That's a lot of needles (and a lot of tears)! You want to protect your child. But with so many vaccines at once, you're concerned about exposing him/her to too many unnatural ingredients all at once.                                                                                    | You're the kind of person who will do everything she can to protect her baby from pain or unnecessary medicines. |

1  
2  
3 Author Statement.

4  
5 Amanda Dempsey, Nicole Wagner and Jennifer Pyrzanowski wrote the first draft of the  
6  
7 protocol. All other authors reviewed the protocol and provided substantive edits and additions  
8  
9 to the text, tables and/or figures.  
10  
11  
12  
13  
14  
15

16 Funding Statement:

17  
18  
19 This work was funded by the National Institutes of Health, Eunice Kennedy Shriver National  
20  
21 Institute of Child Health and Human Development, # R01HD079457.  
22  
23  
24  
25  
26  
27

28 Competing Interests:

29  
30  
31 Amanda Dempsey serves on Advisory Boards for Merck, Pfizer and Sanofi Pasteur, and has  
32  
33 provided consulting services to Pfizer. She does not receive any research funding from these  
34  
35 companies. All other authors have no competing interests to declare.  
36  
37  
38  
39  
40  
41  
42  
43  
44  
45  
46  
47  
48  
49  
50  
51  
52  
53  
54  
55  
56  
57  
58  
59  
60

## REFERENCES

1. Roush SW, Murphy TV, Vaccine-Preventable Disease Table Working G. Historical comparisons of morbidity and mortality for vaccine-preventable diseases in the United States. *Jama*. 2007;298(18):2155-2163.
2. Omer SB, Pan WK, Halsey NA, et al. Nonmedical exemptions to school immunization requirements: secular trends and association of state policies with pertussis incidence. *Jama*. 2006;296(14):1757-1763.
3. Glanz JM, Newcomer SR, Narwaney KJ, et al. A population-based cohort study of undervaccination in 8 managed care organizations across the United States. *JAMA pediatrics*. 2013;167(3):274-281.
4. Omer SB, Salmon DA, Orenstein WA, deHart MP, Halsey N. Vaccine refusal, mandatory immunization, and the risks of vaccine-preventable diseases. *The New England journal of medicine*. 2009;360(19):1981-1988.
5. Siddiqui M, Salmon DA, Omer SB. Epidemiology of vaccine hesitancy in the United States. *Human vaccines & immunotherapeutics*. 2013;9(12):2643-2648.
6. National Vaccine Advisory Committee. Assessing the state of vaccine confidence in the United States: recommendations from the National Vaccine Advisory Committee. *Pub Health Rep*. 2015;130:573-595.
7. Trivedi D. Cochrane review summary: Face-to-face interventions for informing or educating parents about early childhood vaccination. *Prim Health Care Res Dev*. 2014;15(4):339-341.
8. Sadaf A, Richards JL, Glanz J, Salmon DA, Omer SB. A systematic review of interventions for reducing parental vaccine refusal and vaccine hesitancy. *Vaccine*. 2013;31(40):4293-4304.
9. Connors JT, Slotwinski KL, Hodges EA. Provider-parent Communication When Discussing Vaccines: A Systematic Review. *Journal of pediatric nursing*. 2016.

10. MacDonald NE. Vaccine hesitancy: Definition, scope and determinants. *Vaccine*. 2015;33(34):4161-4164.
11. Dube E, Vivion M, MacDonald NE. Vaccine hesitancy, vaccine refusal and the anti-vaccine movement: influence, impact and implications. *Expert review of vaccines*. 2015;14(1):99-117.
12. Opel DJ, Marcuse EK. Window or mirror: social networks' role in immunization decisions. *Pediatrics*. 2013;131(5):e1619-1620.
13. Opel DJ, Heritage J, Taylor JA, et al. The architecture of provider-parent vaccine discussions at health supervision visits. *Pediatrics*. 2013;132(6):1037-1046.
14. Hough-Telford C, Kimberlin DW, Aban I, et al. Vaccine Delays, Refusals, and Patient Dismissals: A Survey of Pediatricians. *Pediatrics*. 2016;138(3).
15. MacDonald NE, Butler R, Dube E. Addressing barriers to vaccine acceptance: an overview. *Human vaccines & immunotherapeutics*. 2017:0.
16. Hawkins RP, Kreuter M, Resnicow K, Fishbein M, Dijkstra A. Understanding tailoring in communicating about health. *Health education research*. 2008;23(3):454-466.
17. Kreuter MW, Strecher VJ, Glassman B. One size does not fit all: the case for tailoring print materials. *Annals of behavioral medicine : a publication of the Society of Behavioral Medicine*. 1999;21(4):276-283.
18. Noar SM, Benac CN, Harris MS. Does tailoring matter? Meta-analytic review of tailored print health behavior change interventions. *Psychol Bull*. 2007;133(4):673-693.
19. I A. The theory of planned behavior. *Organiz Behavior and Human Dec Processes*. 1991;50(2):179-211.
20. Homer P, Kahle LR. A structural equation test of the value-attitude-behavior hierarchy. *J Personality Soc Psychol*. 1988;54(4):638.

- 1
  - 2
  - 3
  - 4
  - 5
  - 6
  - 7
  - 8
  - 9
  - 10
  - 11
  - 12
  - 13
  - 14
  - 15
  - 16
  - 17
  - 18
  - 19
  - 20
  - 21
  - 22
  - 23
  - 24
  - 25
  - 26
  - 27
  - 28
  - 29
  - 30
  - 31
  - 32
  - 33
  - 34
  - 35
  - 36
  - 37
  - 38
  - 39
  - 40
  - 41
  - 42
  - 43
  - 44
  - 45
  - 46
  - 47
  - 48
  - 49
  - 50
  - 51
  - 52
  - 53
  - 54
  - 55
  - 56
  - 57
  - 58
  - 59
  - 60
21. McCain J. To Heal the Body, Get Into the Patient's Head: Motivational Interviewing: To improve adherence. *Biotechnol Healthc*. 2012;9(4):10-12.
22. Sweeney AM, Moyer A. Self-affirmation and responses to health messages: a meta-analysis on intentions and behavior. *Health psychology : official journal of the Division of Health Psychology, American Psychological Association*. 2015;34(2):149-159.
23. Flannery M. Self-Determination Theory: Intrinsic Motivation and Behavioral Change. *Oncology nursing forum*. 2017;44(2):155-156.
24. Boer D FR. How and when do personal values guide our attitudes and sociality? Explaining cross-cultural variability in attitude-value linkages. *Psychol Bull*. 2013;139(5):1113-1147.
25. Shim S MJ. A cognitive and behavioral hierarchical decision-making model of college students' alcohol consumption. *Psychol and Marketing*. 2005;22(8):649-668.
26. Homer PM, Kahle LR. A structural equation test of the value-attitude-behavior hierarchy. *Journal of Personality and social Psychology*. 1988;54(4):638.
27. Boer D, Fischer R. How and when do personal values guide our attitudes and sociality? Explaining cross-cultural variability in attitude-value linkages. *Psychol Bull*. 2013;139(5):1113-1147.
28. Shim S, Maggs J. A cognitive and behavioral hierarchical decision-making model of college students' alcohol consumption. *Psychology & Marketing*. 2005;22(8):649-668.
29. Glanz JM, Kraus CR, Daley MF. Addressing Parental Vaccine Concerns: Engagement, Balance, and Timing. *PLoS biology*. 2015;13(8):e1002227.
30. O'Leary ST, Brewer SE, Pyrzanowski J, et al. Timing of Information-Seeking about Infant Vaccines. *The Journal of pediatrics*. 2018.
31. JA S. Concerns, Attitudes, Beliefs and Intentions of Parents about Vaccines for their Child. In. Denver, CO: School of Public Affairs, University of Colorado Denver; 2015.

- 1  
2  
3 32. Kwan B, Dempsey, AF, Cataldi, J, Pyrzanowski, J, Sevick, C, Narwaney, K, Glanz, J, Wagner, N. The  
4 relationship between parental values and attitudes towards childhood vaccination: informing  
5 tailored interventions. Paper presented at: Society of Behavioral Medicine 2016; Washington,  
6 DC.  
7  
8  
9  
10  
11  
12 33. Cataldi J, Sevick, C, Wagner, N, Pyrzanowski, J, Narwaney, K, Glanz, J, Dempsey A, Kwan, B.  
13 Personal values: A new target for addressing vaccine hesitancy? Paper presented at: Pediatric  
14 Academic Societies 2016; Baltimore, MD.  
15  
16  
17  
18  
19 34. *Bright Futures: Guidelines for Health Supervision of Infants, Children, and Adolescents. 2nd ed.*  
20 *Revised.* Arlington, VA: National Center for Education in maternal and Child Health; 2002.  
21  
22  
23  
24 35. Robinson CL, Romero JR, Kempe A, Pellegrini C. Advisory Committee on Immunization Practices  
25 Recommended Immunization Schedule for Children and Adolescents Aged 18 Years or Younger -  
26 United States, 2017. *MMWR Morbidity and mortality weekly report.* 2017;66(5):134-135.  
27  
28  
29  
30 36. Daley MF, Narwaney KJ, Shoup JA, Wagner NM, Glanz JM. Addressing Parents' Vaccine  
31 Concerns: A Randomized Trial of a Social Media Intervention. *American journal of preventive*  
32 *medicine.* 2018.  
33  
34  
35  
36  
37  
38  
39  
40  
41  
42  
43  
44  
45  
46  
47  
48  
49  
50  
51  
52  
53  
54  
55  
56  
57  
58  
59  
60

Figure 1: Model of parental vaccine values, vaccine attitudes, hesitancy and behavior

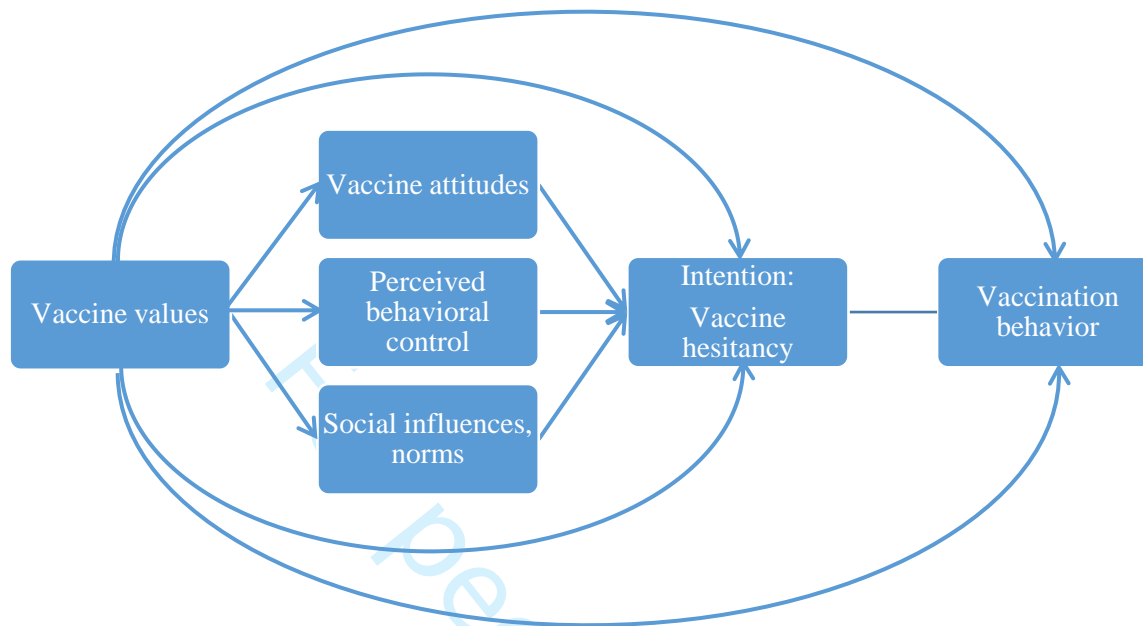



Figure 2: Screenshots of the Tailored and Untailored Intervention Websites

## A. Tailored Website

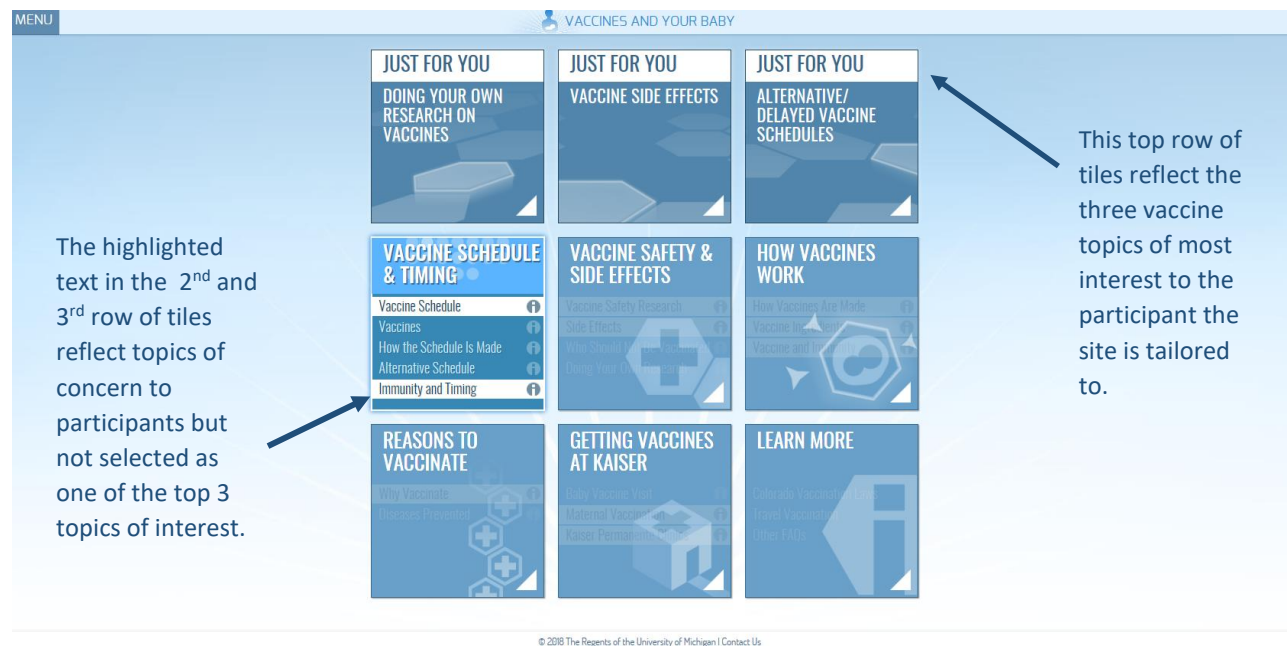

## B. Untailored Website

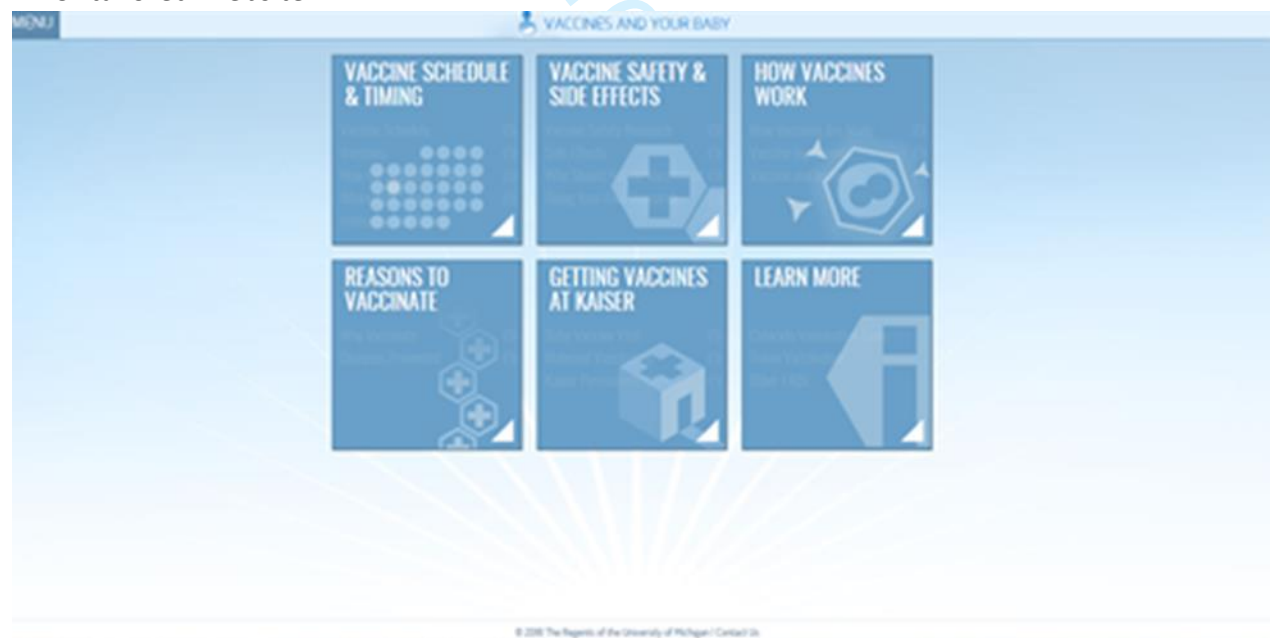

Figure Legend. The right arrow denotes the “Just for You” tiles that represent the most highly tailored content on the VAYB website. The left arrow denotes additional text reflecting lightly tailored material that is particularly salient to the participant based on their survey responses.

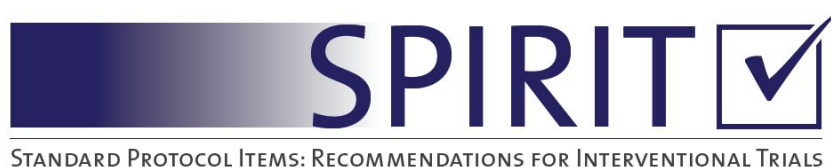

STANDARD PROTOCOL ITEMS: RECOMMENDATIONS FOR INTERVENTIONAL TRIALS

**The “Reducing Delays In Vaccination” (REDIVAC) Trial: A protocol for a randomized controlled trial of a web-based, individually tailored, educational intervention to improve timeliness of infant vaccination**

| Section/item                      | Item No | Description                                                                                                                                                                                                                                                                              | Page Number on which item is reported |
|-----------------------------------|---------|------------------------------------------------------------------------------------------------------------------------------------------------------------------------------------------------------------------------------------------------------------------------------------------|---------------------------------------|
| <b>Administrative information</b> |         |                                                                                                                                                                                                                                                                                          |                                       |
| Title                             | 1       | Descriptive title identifying the study design, population, interventions, and, if applicable, trial acronym                                                                                                                                                                             | 1                                     |
| Trial registration                | 2a      | Trial identifier and registry name. If not yet registered, name of intended registry                                                                                                                                                                                                     | 3, 8                                  |
|                                   | 2b      | All items from the World Health Organization Trial Registration Data Set                                                                                                                                                                                                                 | n/a                                   |
| Protocol version                  | 3       | Date and version identifier                                                                                                                                                                                                                                                              | 1                                     |
| Funding                           | 4       | Sources and types of financial, material, and other support                                                                                                                                                                                                                              | 34                                    |
| Roles and responsibilities        | 5a      | Names, affiliations, and roles of protocol contributors                                                                                                                                                                                                                                  | 1, 34                                 |
|                                   | 5b      | Name and contact information for the trial sponsor                                                                                                                                                                                                                                       | n/a                                   |
|                                   | 5c      | Role of study sponsor and funders, if any, in study design; collection, management, analysis, and interpretation of data; writing of the report; and the decision to submit the report for publication, including whether they will have ultimate authority over any of these activities | n/a                                   |
|                                   | 5d      | Composition, roles, and responsibilities of the coordinating centre, steering committee, endpoint adjudication committee, data management team, and other individuals or groups overseeing the trial, if applicable (see Item 21a for data monitoring committee)                         | n/a                                   |
| <b>Introduction</b>               |         |                                                                                                                                                                                                                                                                                          |                                       |

|                                                           |     |                                                                                                                                                                                                                                                                                                                                                                                |       |
|-----------------------------------------------------------|-----|--------------------------------------------------------------------------------------------------------------------------------------------------------------------------------------------------------------------------------------------------------------------------------------------------------------------------------------------------------------------------------|-------|
| Background and rationale                                  | 6a  | Description of research question and justification for undertaking the trial, including summary of relevant studies (published and unpublished) examining benefits and harms for each intervention                                                                                                                                                                             | 5-6   |
|                                                           | 6b  | Explanation for choice of comparators                                                                                                                                                                                                                                                                                                                                          | 15    |
| Objectives                                                | 7   | Specific objectives or hypotheses                                                                                                                                                                                                                                                                                                                                              | 8     |
| Trial design                                              | 8   | Description of trial design including type of trial (eg, parallel group, crossover, factorial, single group), allocation ratio, and framework (eg, superiority, equivalence, noninferiority, exploratory)                                                                                                                                                                      | 8-9   |
| <b>Methods: Participants, interventions, and outcomes</b> |     |                                                                                                                                                                                                                                                                                                                                                                                |       |
| Study setting                                             | 9   | Description of study settings (eg, community clinic, academic hospital) and list of countries where data will be collected. Reference to where list of study sites can be obtained                                                                                                                                                                                             | 9     |
| Eligibility criteria                                      | 10  | Inclusion and exclusion criteria for participants. If applicable, eligibility criteria for study centres and individuals who will perform the interventions (eg, surgeons, psychotherapists)                                                                                                                                                                                   | 10    |
| Interventions                                             | 11a | Interventions for each group with sufficient detail to allow replication, including how and when they will be administered                                                                                                                                                                                                                                                     | 13-16 |
|                                                           | 11b | Criteria for discontinuing or modifying allocated interventions for a given trial participant (eg, drug dose change in response to harms, participant request, or improving/worsening disease)                                                                                                                                                                                 | n/a   |
|                                                           | 11c | Strategies to improve adherence to intervention protocols, and any procedures for monitoring adherence (eg, drug tablet return, laboratory tests)                                                                                                                                                                                                                              | 19    |
|                                                           | 11d | Relevant concomitant care and interventions that are permitted or prohibited during the trial                                                                                                                                                                                                                                                                                  | n/a   |
| Outcomes                                                  | 12  | Primary, secondary, and other outcomes, including the specific measurement variable (eg, systolic blood pressure), analysis metric (eg, change from baseline, final value, time to event), method of aggregation (eg, median, proportion), and time point for each outcome. Explanation of the clinical relevance of chosen efficacy and harm outcomes is strongly recommended | 16-18 |

|                                                                     |     |                                                                                                                                                                                                                                                                                                                                                          |        |
|---------------------------------------------------------------------|-----|----------------------------------------------------------------------------------------------------------------------------------------------------------------------------------------------------------------------------------------------------------------------------------------------------------------------------------------------------------|--------|
| Participant timeline                                                | 13  | Time schedule of enrolment, interventions (including any run-ins and washouts), assessments, and visits for participants. A schematic diagram is highly recommended (see Figure)                                                                                                                                                                         | 18     |
| Sample size                                                         | 14  | Estimated number of participants needed to achieve study objectives and how it was determined, including clinical and statistical assumptions supporting any sample size calculations                                                                                                                                                                    | 13     |
| Recruitment                                                         | 15  | Strategies for achieving adequate participant enrolment to reach target sample size                                                                                                                                                                                                                                                                      | 11, 19 |
| <b>Methods: Assignment of interventions (for controlled trials)</b> |     |                                                                                                                                                                                                                                                                                                                                                          |        |
| Allocation:                                                         |     |                                                                                                                                                                                                                                                                                                                                                          |        |
| Sequence generation                                                 | 16a | Method of generating the allocation sequence (eg, computer-generated random numbers), and list of any factors for stratification. To reduce predictability of a random sequence, details of any planned restriction (eg, blocking) should be provided in a separate document that is unavailable to those who enrol participants or assign interventions | 12     |
| Allocation concealment mechanism                                    | 16b | Mechanism of implementing the allocation sequence (eg, central telephone; sequentially numbered, opaque, sealed envelopes), describing any steps to conceal the sequence until interventions are assigned                                                                                                                                                | 12     |
| Implementation                                                      | 16c | Who will generate the allocation sequence, who will enrol participants, and who will assign participants to interventions                                                                                                                                                                                                                                | 12     |
| Blinding (masking)                                                  | 17a | Who will be blinded after assignment to interventions (eg, trial participants, care providers, outcome assessors, data analysts), and how                                                                                                                                                                                                                | 12     |
|                                                                     | 17b | If blinded, circumstances under which unblinding is permissible, and procedure for revealing a participant's allocated intervention during the trial                                                                                                                                                                                                     | 12     |
| <b>Methods: Data collection, management, and analysis</b>           |     |                                                                                                                                                                                                                                                                                                                                                          |        |

|                                                          |                            |     |                                                                                                                                                                                                                                                                                                                                                                                                              |       |
|----------------------------------------------------------|----------------------------|-----|--------------------------------------------------------------------------------------------------------------------------------------------------------------------------------------------------------------------------------------------------------------------------------------------------------------------------------------------------------------------------------------------------------------|-------|
| 1<br>2<br>3<br>4<br>5<br>6<br>7<br>8<br>9<br>10<br>11    | Data collection methods    | 18a | Plans for assessment and collection of outcome, baseline, and other trial data, including any related processes to promote data quality (eg, duplicate measurements, training of assessors) and a description of study instruments (eg, questionnaires, laboratory tests) along with their reliability and validity, if known. Reference to where data collection forms can be found, if not in the protocol | 16-18 |
| 12<br>13<br>14<br>15<br>16<br>17                         |                            | 18b | Plans to promote participant retention and complete follow-up, including list of any outcome data to be collected for participants who discontinue or deviate from intervention protocols                                                                                                                                                                                                                    | 19    |
| 18<br>19<br>20<br>21<br>22<br>23<br>24<br>25             | Data management            | 19  | Plans for data entry, coding, security, and storage, including any related processes to promote data quality (eg, double data entry; range checks for data values). Reference to where details of data management procedures can be found, if not in the protocol                                                                                                                                            | 19    |
| 26<br>27<br>28<br>29<br>30<br>31                         | Statistical methods        | 20a | Statistical methods for analysing primary and secondary outcomes. Reference to where other details of the statistical analysis plan can be found, if not in the protocol                                                                                                                                                                                                                                     | 20-22 |
| 32<br>33<br>34                                           |                            | 20b | Methods for any additional analyses (eg, subgroup and adjusted analyses)                                                                                                                                                                                                                                                                                                                                     | 22    |
| 35<br>36<br>37<br>38<br>39<br>40                         |                            | 20c | Definition of analysis population relating to protocol non-adherence (eg, as randomised analysis), and any statistical methods to handle missing data (eg, multiple imputation)                                                                                                                                                                                                                              | 21    |
| 41<br>42                                                 | <b>Methods: Monitoring</b> |     |                                                                                                                                                                                                                                                                                                                                                                                                              |       |
| 43<br>44<br>45<br>46<br>47<br>48<br>49<br>50<br>51<br>52 | Data monitoring            | 21a | Composition of data monitoring committee (DMC); summary of its role and reporting structure; statement of whether it is independent from the sponsor and competing interests; and reference to where further details about its charter can be found, if not in the protocol. Alternatively, an explanation of why a DMC is not needed                                                                        | 22-23 |
| 53<br>54<br>55<br>56<br>57<br>58<br>59<br>60             |                            | 21b | Description of any interim analyses and stopping guidelines, including who will have access to these interim results and make the final decision to terminate the trial                                                                                                                                                                                                                                      | n/a   |

|                                 |     |                                                                                                                                                                                                                                                                                     |        |
|---------------------------------|-----|-------------------------------------------------------------------------------------------------------------------------------------------------------------------------------------------------------------------------------------------------------------------------------------|--------|
| Harms                           | 22  | Plans for collecting, assessing, reporting, and managing solicited and spontaneously reported adverse events and other unintended effects of trial interventions or trial conduct                                                                                                   | 23     |
| Auditing                        | 23  | Frequency and procedures for auditing trial conduct, if any, and whether the process will be independent from investigators and the sponsor                                                                                                                                         | n/a    |
| <b>Ethics and dissemination</b> |     |                                                                                                                                                                                                                                                                                     |        |
| Research ethics approval        | 24  | Plans for seeking research ethics committee/institutional review board (REC/IRB) approval                                                                                                                                                                                           | 23     |
| Protocol amendments             | 25  | Plans for communicating important protocol modifications (eg, changes to eligibility criteria, outcomes, analyses) to relevant parties (eg, investigators, REC/IRBs, trial participants, trial registries, journals, regulators)                                                    | 23     |
| Consent or assent               | 26a | Who will obtain informed consent or assent from potential trial participants or authorised surrogates, and how (see Item 32)                                                                                                                                                        | 11, 23 |
|                                 | 26b | Additional consent provisions for collection and use of participant data and biological specimens in ancillary studies, if applicable                                                                                                                                               | n/a    |
| Confidentiality                 | 27  | How personal information about potential and enrolled participants will be collected, shared, and maintained in order to protect confidentiality before, during, and after the trial                                                                                                | 19, 24 |
| Declaration of interests        | 28  | Financial and other competing interests for principal investigators for the overall trial and each study site                                                                                                                                                                       | 24     |
| Access to data                  | 29  | Statement of who will have access to the final trial dataset, and disclosure of contractual agreements that limit such access for investigators                                                                                                                                     | 24     |
| Ancillary and post-trial care   | 30  | Provisions, if any, for ancillary and post-trial care, and for compensation to those who suffer harm from trial participation                                                                                                                                                       | n/a    |
| Dissemination policy            | 31a | Plans for investigators and sponsor to communicate trial results to participants, healthcare professionals, the public, and other relevant groups (eg, via publication, reporting in results databases, or other data sharing arrangements), including any publication restrictions | 24-25  |

|                            |     |                                                                                                                                                                                                |     |
|----------------------------|-----|------------------------------------------------------------------------------------------------------------------------------------------------------------------------------------------------|-----|
|                            | 31b | Authorship eligibility guidelines and any intended use of professional writers                                                                                                                 | n/a |
|                            | 31c | Plans, if any, for granting public access to the full protocol, participant-level dataset, and statistical code                                                                                | 25  |
| <b>Appendices</b>          |     |                                                                                                                                                                                                |     |
| Informed consent materials | 32  | Model consent form and other related documentation given to participants and authorised surrogates                                                                                             | n/a |
| Biological specimens       | 33  | Plans for collection, laboratory evaluation, and storage of biological specimens for genetic or molecular analysis in the current trial and for future use in ancillary studies, if applicable | n/a |

\*It is strongly recommended that this checklist be read in conjunction with the SPIRIT 2013 Explanation & Elaboration for important clarification on the items. Amendments to the protocol should be tracked and dated. The SPIRIT checklist is copyrighted by the SPIRIT Group under the Creative Commons "[Attribution-NonCommercial-NoDerivs 3.0 Unported](https://creativecommons.org/licenses/by-nc-nd/3.0/)" license.



# BMJ Open

## The “Reducing Delays In Vaccination” (REDIVAC) Trial: A protocol for a randomized controlled trial of a web-based, individually tailored, educational intervention to improve timeliness of infant vaccination

|                                 |                                                                                                                                                                                                                                                                                                                                                                                                                                                                                                                                                                                                                                                                                                                                                                                                                          |
|---------------------------------|--------------------------------------------------------------------------------------------------------------------------------------------------------------------------------------------------------------------------------------------------------------------------------------------------------------------------------------------------------------------------------------------------------------------------------------------------------------------------------------------------------------------------------------------------------------------------------------------------------------------------------------------------------------------------------------------------------------------------------------------------------------------------------------------------------------------------|
| Journal:                        | <i>BMJ Open</i>                                                                                                                                                                                                                                                                                                                                                                                                                                                                                                                                                                                                                                                                                                                                                                                                          |
| Manuscript ID                   | bmjopen-2018-027968.R1                                                                                                                                                                                                                                                                                                                                                                                                                                                                                                                                                                                                                                                                                                                                                                                                   |
| Article Type:                   | Protocol                                                                                                                                                                                                                                                                                                                                                                                                                                                                                                                                                                                                                                                                                                                                                                                                                 |
| Date Submitted by the Author:   | 20-Feb-2019                                                                                                                                                                                                                                                                                                                                                                                                                                                                                                                                                                                                                                                                                                                                                                                                              |
| Complete List of Authors:       | Dempsey, Amanda; University of Colorado Denver, USA,<br>Wagner, Nicole; Kaiser Permanente Colorado,, Institute for Health Research<br>Narwaney, Komal; Kaiser Permanente Colorado, Institute for Health Research<br>Pyrzanowski, Jennifer; University of Colorado Denver<br>Kwan, Bethany; University of Colorado School of Medicine, Family Medicine<br>Kraus, Courtney; Kaiser Permanente, Institute for Health Research<br>Gleason, Kathy; Kaiser Permanente Colorado , Institute for Health Research<br>Resnicow, Ken; University of Michigan, Health Education and Health Behavior<br>sevick, carter; University of Colorado Denver<br>Cataldi, Jessica; University of Colorado Denver<br>Brewer, Sarah; University of Colorado Denver<br>Glanz, Jason M; Kaiser Permanente Colorado, Institute for Health Research |
| <b>Primary Subject Heading</b>: | Infectious diseases                                                                                                                                                                                                                                                                                                                                                                                                                                                                                                                                                                                                                                                                                                                                                                                                      |
| Secondary Subject Heading:      | Paediatrics                                                                                                                                                                                                                                                                                                                                                                                                                                                                                                                                                                                                                                                                                                                                                                                                              |
| Keywords:                       | immunization, mothers, vaccine hesitancy, randomized controlled trial                                                                                                                                                                                                                                                                                                                                                                                                                                                                                                                                                                                                                                                                                                                                                    |
|                                 |                                                                                                                                                                                                                                                                                                                                                                                                                                                                                                                                                                                                                                                                                                                                                                                                                          |

SCHOLARONE™  
Manuscripts





1  
2  
3 Affiliations:  
4  
5

6 <sup>1</sup> Adult and Child Consortium for Outcomes Research and Delivery Science (ACCORDS),  
7

8  
9 University of Colorado Denver, Aurora, CO  
10

11  
12 <sup>2</sup> Kaiser Permanente Colorado, Institute for Health Research, Denver CO  
13

14  
15 <sup>3</sup> School of Public Health, Division of Health Behavior and Health Education, University of  
16

17 Michigan, Ann Arbor, MI  
18  
19  
20  
21  
22

23  
24 Word Count: 4690  
25  
26  
27  
28  
29  
30  
31  
32  
33  
34  
35  
36  
37  
38  
39  
40  
41  
42  
43  
44  
45  
46  
47  
48  
49  
50  
51  
52  
53  
54  
55  
56  
57  
58  
59  
60

## Abstract

### Introduction:

Increasing numbers of children are failing to receive many recommended vaccines, which has led to significant outbreaks of vaccine preventable diseases in the US and worldwide. A major driver of undervaccination is parental vaccine hesitance. Prior research demonstrates that mothers are the primary decision maker for infant vaccination, and that their vaccination attitudes form primarily during pregnancy and early in their infant's life.

### Methods and Analysis:

This manuscript describes the protocol for an ongoing 3-armed, randomized controlled trial done at Kaiser Permanente Colorado. The trial aims to test the efficacy of provided tailored, individualized information via the internet to pregnant and new mothers versus untailored information versus usual care on the timeliness of infant vaccination. The primary outcome to be assessed is vaccination status, which is a dichotomous outcome (up to date versus not) assessed at 200 days of age, reflecting the time when infants should have completed the first set of vaccine provided (at age 2, 4 and 6 months). Infants with one or more age-appropriate recommended vaccines at least 30 days delayed are categorized as not up to date whereas all other infants are considered up to date. Secondary outcomes include vaccination status at 489 days, reflecting receive of recommended vaccines at 12-15 months of age, as well as vaccination attitudes, hesitancy and intention. Vaccination data will be derived from the

1  
2  
3 electronic medical record and the state immunization registry. Other secondary outcomes will  
4  
5 be assessed by online surveys.  
6  
7  
8  
9  
10

11 Ethics and Dissemination:  
12  
13

14  
15 The study activities were approved by the Institutional Review Boards of the University of  
16  
17 Colorado, Kaiser Permanente Colorado, and the University of Michigan. Results will be  
18  
19 disseminated through peer reviewed manuscripts and conference presentations.  
20  
21  
22  
23  
24  
25  
26  
27  
28  
29  
30  
31  
32  
33  
34  
35  
36  
37  
38  
39  
40  
41  
42  
43  
44  
45  
46  
47  
48  
49  
50  
51  
52  
53  
54  
55  
56  
57  
58  
59  
60

1  
2  
3  
4  
5  
6 **Article Summary:**  
7

8  
9 **Strengths and Limitations of the Study:**  
10

- 11  
12 - **Strength:** Randomized, controlled trial design  
13  
14 - **Strength:** Population based sample  
15  
16 - **Strength:** Longitudinal analysis of EMR data  
17  
18 - **Limitation:** Only one geographic area limits generalizability  
19  
20  
21  
22  
23  
24  
25  
26  
27  
28

29 Trial Registration: This trial has been registered at ClinicalTrials.gov - NCT02665013.  
30  
31  
32  
33  
34  
35  
36  
37

38 Key words: vaccine hesitancy; immunization; mothers; clinical trial  
39  
40  
41  
42  
43  
44  
45  
46  
47  
48  
49  
50  
51  
52  
53  
54  
55  
56  
57  
58  
59  
60

## Introduction

Vaccination has been touted as one of the most effective public health interventions ever created.<sup>1</sup> Despite this, increasing numbers of parents choose to delay or forgo recommended vaccines for their children because of uncertainty about the vaccines' safety and necessity and general mistrust of the pharmaceutical industry.<sup>2,3</sup> With this, increasing numbers of children are failing to receive many recommended vaccines, which has led to significant outbreaks of vaccine preventable diseases in the US and worldwide.<sup>4,5</sup>

Developing and evaluating interventions to counteract parental vaccine hesitancy and childhood under-vaccination is a public health priority.<sup>6</sup> While many prior interventions have been tested, the majority have not been effective.<sup>7-9</sup> Addressing vaccine hesitancy can be difficult and time consuming because parents' vaccination decisions are often complex as they are heavily influenced by emotion, past experiences, and peers.<sup>10-12</sup> Addressing this complexity can be difficult for health care providers who attempt to persuade parents to vaccinate their children,<sup>13</sup> given that typical pediatric clinical encounters last only 15 to 20 minutes. As a result, even when parents only have a few questions that might be easily answered, a provider may feel "burnt out" when having to discuss vaccines with questioning parents.<sup>14</sup> In addition, in many cases the resistance to vaccination is related to psychosocial and political beliefs as much, or even more than, knowledge deficits.

Given this, new approaches to address vaccine hesitancy that are time efficient and address the complex factors influencing vaccine decision-making are needed.<sup>15</sup> One promising approach is

1  
2  
3 to use message tailoring to provide parents with information about vaccines that is customized  
4  
5 to their own personal needs *before* their child’s clinical appointments. Message tailoring allows  
6  
7 for written information to be individualized to reflect each person’s unique beliefs, experiences,  
8  
9 knowledge, attitudes, and barriers to action.<sup>16</sup> By doing so, the personal relevance of the  
10  
11 information increases which in turn improves individuals’ receptiveness to that information –  
12  
13 this is especially important in the case of vaccine hesitancy when the new information may not  
14  
15 align with a person’s current attitudes or beliefs.<sup>16</sup> This approach has been shown to be  
16  
17 effective for improving compliance with a number of health behaviors but only minimally  
18  
19 applied to vaccination.<sup>17,18</sup>

20  
21  
22  
23  
24  
25  
26  
27 This manuscript describes the protocol for a 3-armed randomized controlled trial testing the  
28  
29 effectiveness of a web-based tailored messaging intervention called “Vaccines and Your Baby”  
30  
31 (VAYB) versus an untailed version of the intervention versus usual care for improving timely  
32  
33 uptake of recommended childhood vaccines.  
34  
35  
36  
37  
38  
39  
40

#### 41 Conceptual Model

42  
43 The conceptual model for the intervention is based on a hybrid of the theory of planned  
44  
45 behavior (TPB) and the value-attitude-behavior hierarchy model (Figure 1).<sup>19,20</sup> It also  
46  
47 incorporates strategies derived from motivational interviewing and self-affirmation.<sup>21,22</sup>  
48  
49  
50 According to the TPB, behavior (in this case, following the recommended vaccination schedule)  
51  
52 is influenced by intentions (in this case, vaccine hesitancy), which are a result of attitudes  
53  
54 towards the behavior, perceived behavioral control, and norms. This intervention primarily  
55  
56  
57  
58  
59  
60

1  
2  
3 focuses on strategies for influencing attitudes – i.e., tailored messages addressing individual  
4 behavioral beliefs (e.g., beliefs that immunity is best achieved through exposure to a pathogen,  
5 or “natural immunity”) framed according to personal values (e.g., emphasizing the benefits of  
6 vaccination for preventing spread of illness among the young and elderly for those who value  
7 protecting one’s community). By affirming individual patient values and identity, using non-  
8 judgmental and empathetic language, emphasizing autonomy (i.e. adding tenets from  
9 Motivational interviewing and Self Determination Theory)<sup>21,23,24</sup> and constructing controlling  
10 tones of messages, this can minimize reactance and counterarguments. Individually tailored  
11 messages in general are known to have greater effects on attitude change than are universal  
12 (untailored) messages.<sup>20,25,26</sup> According to the value-attitude-behavior hierarchy model<sup>27</sup>,  
13 values influence attitudes and behavior across cultures and domains, including recycling,  
14 consumer behavior, and alcohol consumption.<sup>28,29</sup> This hybrid approach to establishing the  
15 conceptual model allows us to focus the intervention strategies on addressing a select set of  
16 known determinants of vaccine hesitancy and behavior, rather than incorporating the universe  
17 of behavior change techniques into our intervention.

### 42 **Aim and Hypothesis**

43  
44  
45  
46 The primary aim of this study is to conduct a three-group randomized, intervention trial to  
47 measure the effectiveness of the VAYB intervention versus a similarly constructed but  
48 untailored intervention versus usual care on vaccination receipt and timeliness during an  
49 infant’s first 15 months of life. Our intervention approach (the VAYB intervention) is novel in  
50 that it combines values framing with message tailoring for vaccination to change parents’  
51  
52  
53  
54  
55  
56  
57  
58  
59  
60



1  
2  
3 attitudes and behavior. The primary hypothesis to be tested is that infants of mothers who  
4 receive values-framed, individually tailored messages (e.g. the VAYB intervention) will have  
5 lower levels of vaccine hesitancy and more up to date vaccination behavior than those receiving  
6 an untailored version of the intervention or those receiving usual care. A secondary aim of the  
7 project is to assess the impact of the intervention on vaccination attitudes and hesitancy level,  
8 particularly as these relate to our conceptual model described above.  
9  
10  
11  
12  
13  
14  
15  
16  
17  
18  
19  
20  
21

## 22 **Methods**

23  
24 A summary of the trial's specifications is shown in Table 1.  
25  
26  
27  
28  
29  
30

### 31 Study Design and Registration

32  
33 This is a 3-armed, individually randomized clinical trial with longitudinal follow up. Study arms  
34 include 1) the VAYB (tailored) intervention, 2) an untailored version of the intervention and 3)  
35 usual care. The study is registered with ClinicalTrials.gov (NCT02665013, see Table 1 for details).  
36  
37  
38  
39  
40  
41  
42  
43  
44

### 45 Study Overview and Setting

46  
47 In the trial, participants are active in the study from the time of enrollment (from late  
48 pregnancy or the first two months of their infant's life) until their infant reaches 15 months of  
49 age (489 days). The primary vaccination outcome to be assessed is a dichotomous outcome of  
50 vaccination status (up-to-date versus not) that is based on the average number of days under  
51  
52  
53  
54  
55  
56  
57  
58  
59  
60

1  
2  
3 vaccinated for all vaccinations in the recommended vaccine schedule. Assessment of  
4  
5 vaccination for the 2- and 4-month vaccines occurs when the infant is 200 days old (to provide  
6  
7 additional time beyond the exact date the vaccine was due). Secondary vaccination outcomes  
8  
9 and outcomes related to attitudes and hesitancy are assessed at 489 days of age. This time  
10  
11 period was chosen to encompass three critical decision making points associated with the  
12  
13 vaccination process; 1) during pregnancy when many vaccination decisions and attitudes are  
14  
15 being formed;<sup>30,31</sup> 2) during the time period that corresponds to the ages when the initial infant  
16  
17 series is recommended (generally at ages 2, 4 and 6 months); and 3) during the second stage of  
18  
19 the infant vaccination series at age 12-15 months when vaccines different from those offered at  
20  
21 the initial stage are introduced. The primary outcome (vaccination behavior) is assessed using  
22  
23 data from the electronic medical record, augmented with data from the Colorado immunization  
24  
25 registry, CIIS.  
26  
27  
28  
29  
30  
31  
32  
33  
34  
35

36 The study takes place via the internet. Participants in the VAYB and untailed arms view  
37  
38 educational materials on a web-enabled device or computer of their own and are prompted to  
39  
40 view this information again at specific time points during the study (described below).  
41  
42

43 Participants enrolled in the usual care arm receive by mail Vaccine Information Statements (VIS)  
44  
45 for all recommended vaccines in the child's first year of life; VISs are not provided by mail to  
46  
47 participants in the VAYB or untailed arms. Participants in all arms complete surveys at  
48  
49 baseline, and three additional time points (Table 2). Participants are reminded to take the  
50  
51 survey at these intervals via a series of emails. Following survey completion, participants are  
52  
53 taken automatically to the website that contains either tailored or untailed information,  
54  
55  
56  
57  
58  
59  
60

1  
2  
3 depending on study arm. The infants of participants in all arms receive care at participating  
4  
5 clinics (an eligibility criterion, see below) where VISs are provided to all study groups as part of  
6  
7 routine care.  
8  
9

#### 10 11 12 13 14 Study Population and Inclusion/Exclusion Criteria 15

16  
17 Women in the third trimester of pregnancy enrolled at Kaiser Permanente Colorado (KPCO)  
18  
19 between April 2016 and October 2017 are recruited for the trial. KPCO is a nonprofit, managed  
20  
21 care organization serving ~667,000 individuals. Each year ~5,000 pregnant women and 140,000  
22  
23 children receive health care at KPCO clinics. Study participants can enroll from the first  
24  
25 recruitment outreach that occurs in the last trimester of pregnancy to when their infant is  $\leq 2$   
26  
27 months of age. The infant must be enrolled in the KPCO health plan to continue participation in  
28  
29 the study.  
30  
31  
32  
33  
34  
35  
36  
37

38 A combination of electronic medical record (EMR) data and study screening questions are used  
39  
40 to determine study eligibility. First, the EMR is used to identify English speaking women,  
41  
42 currently enrolled at KPCO, and  $\geq 18$  years of age in the last trimester of pregnancy, based on  
43  
44 clinically determined expected delivery date. All identified women with a diagnosis (ICD10)  
45  
46 code in the past 8 months indicating potential abortion, miscarriage, adoption, fetal anomalies,  
47  
48 or genetic disorders in the pregnancy, or a high risk maternal condition (i.e. cancer) are flagged  
49  
50 for potential exclusion. Medical chart reviews are conducted on these women and they are  
51  
52 definitively excluded as potential participants if the EMR indicates their fetus has a high-risk  
53  
54  
55  
56  
57  
58  
59  
60

1  
2  
3 condition (e.g., fatal heart condition, trisomy 18, anencephaly), or they have a spontaneous or  
4  
5 elective abortion, social issues (such as domestic violence), or serious health concerns.

6  
7  
8 Screening questions are delivered online before consent to ensure participants plan to use  
9  
10 KPCO medical care for their child, are  $\geq 18$  years of age, and are currently pregnant or have a  
11  
12 child less than 2 months of age. During the course of the study, participants are removed if  
13  
14 they have a fetal demise, infant death, if the infant loses KPCO insurance coverage for greater  
15  
16 than 90 days, if they request to be removed from the study or if they die. This data is obtained  
17  
18 from a monthly data extraction from the EMR and patient report.  
19  
20  
21  
22  
23  
24  
25

## 26 Consent and Recruitment

27  
28  
29 Recruitment occurs via a multistep process. After the EMR is used to screen for initial eligibility,  
30  
31 a series of 2 letters, 3 emails, and one phone call are sent to potential participants 1-2 weeks  
32  
33 apart to direct patients to the KPCO study registration website created specifically for this  
34  
35 study. On this registration website identity and eligibility are confirmed, and the participant is  
36  
37 consented by signing an online form.  
38  
39  
40  
41  
42  
43  
44

45  
46 After consent participants are directed to the *study* website where they set up login  
47  
48 information and are provided with a Pre-intervention Questionnaire that assesses their baseline  
49  
50 intention to vaccinate, vaccination values, logistical barriers to vaccination, vaccine hesitancy  
51  
52 (used for randomization), and demographics, and re-confirms eligibility. Previously developed  
53  
54 and validated measures are used to assess these items.<sup>32-34</sup> Upon completion of this  
55  
56  
57  
58  
59  
60

1  
2  
3 questionnaire, participants are considered to be “enrolled” in the study and are randomized  
4  
5 (described below). The screening, consent and enrollment process is repeated monthly until  
6  
7 the target sample size is reached.  
8  
9

### 10 11 12 13 14 Assignment of Interventions 15

16  
17 Participants are randomized on a 1:1:1 basis between the VAYB, untailored and usual care  
18  
19 arms. The allocation assignment is generated by back-end software embedded in the study  
20  
21 website. Randomization occurs immediately following enrollment into the study (i.e. after  
22  
23 completion of the pre-intervention questionnaire) and remains in place throughout the study.  
24  
25 Stratified randomization along with a permuted block technique is used such that participants  
26  
27 are first stratified into either a hesitant or non-hesitant group, based on responses to the pre-  
28  
29 intervention questionnaire. Hesitancy status is assessed using a 5-item validated measure  
30  
31 developed by (Opel, personal communication) and participants are categorized based on the  
32  
33 measure’s suggested (but unpublished) cutoffs. Participants from each group are then added to  
34  
35 their own set of blocks that each contain 6. There are 2 slots available for each of the 3 study  
36  
37 arms. These slots are randomly ordered when the block is created. When all 6 slots are filled, a  
38  
39 new block with 6 randomly ordered slots is added.  
40  
41  
42  
43  
44  
45  
46  
47  
48  
49

### 50 Blinding 51 52 53 54 55 56 57 58 59 60

1  
2  
3 Participants are not informed about which study arm they are assigned to, but descriptions of  
4 the three potential arms for assignment are provided in the study consent documents. Thus,  
5  
6 although they are not told specifically which arm they are in, they are not blinded to their study  
7  
8 assignment. The project manager for the study will convert study data to unlabeled arms (i.e.  
9  
10 arm 1, 2 or 3) allowing for the rest of the study team to be blinded to study arm assignment  
11  
12 during the analysis and data interpretation phases of the project. Unblinding will occur when  
13  
14 data analysis is complete for the primary study outcome. Clinics where participants receive  
15  
16 care are not aware of the individuals participating in the study unless brought up by the patient  
17  
18 during a clinical encounter.  
19  
20  
21  
22  
23  
24  
25  
26  
27  
28

### 29 Sample Size Calculation

30  
31  
32 We considered, based on prior studies,<sup>3,35</sup> an odds ratio (OR) between 2.0 and 3.0 for up-to-  
33  
34 date vaccination status between the intervention study arms and usual care to be clinically  
35  
36 meaningful. For this, we estimate a needed sample size of 477 (OR = 3.0) to 1002 (OR=2.0)  
37  
38 participants. This sample size is based on an assumption of 15% of the recruited population  
39  
40 being vaccine hesitant (as has been the case in prior studies in this population)<sup>35</sup> and therefore  
41  
42 not up to date in their infant's vaccination, a 1:1:1 randomization allocation ratio, two-sided  
43  
44 tests of statistical significance, 80% statistical power, and a 5% type I error rate. Accounting for  
45  
46 an attrition of 15%, we need to enroll 561 to 1179 participants.  
47  
48  
49  
50  
51  
52  
53

### 54 Interventions

## Tailored Intervention

In the VAYB arm messages were tailored for multiple constructs including intention to vaccinate, personal attitudes about vaccines, vaccination values (Table 2), vaccination beliefs and concerns, logistical barriers to vaccination, and child's name, sex and birthday. Data to inform this initial tailoring come from the Pre-Intervention Questionnaire. Interim questionnaires are used to refresh the tailored information at 3 times during the study period. Tailoring occurs based on an embedded algorithm that is part of the VAYB website. An in-depth description of the process used to develop the VAYB intervention, and the resulting content, is described in detail elsewhere but examples are provided in Table 3.<sup>33,34</sup>

Upon completion of the pre-intervention questionnaire where initial tailoring information is obtained, participants are automatically directed to the VAYB website which is individually customized based on their responses. The most highly tailored content is in three "Just for You" tiles that are displayed prominently on the page (Figure 2A). These tiles reflect the top three vaccine topics of concern that each participant indicates they want more information about and are further customized to highlight the vaccination values the participant most endorses, and to reflect their most recently reported intention to vaccinate. The remaining content is lightly tailored to reflect participant's attitudes, concerns, hesitancy and demographics, but is not tailored based on vaccination values. Highlighted text on the home page (Figure 2A) is used to further identify additional information that is most relevant to the participant based on their survey answers. The website is refreshed 3 times during the course

1  
2  
3 of the study based on interim assessments of participants' attitudes, beliefs, concerns, values  
4 and vaccine hesitancy. Specifically, when the infant is 4 to 6 months of age, participants re-  
5 answer all questions excluding the value items and questions used to assess vaccine hesitancy,  
6 and the content is refreshed accordingly. Values are reassessed again in a 3rd survey when the  
7 infant is 10 to 12 months and the website is refreshed to reflect any new content. Vaccine  
8 hesitancy level is reassessed at a 4<sup>th</sup> survey and the content is again refreshed. Participants  
9 receive a gift card after each survey is completed. For all time points, vaccination intention is  
10 assessed immediately before and within the hour after viewing the website content (VAYB and  
11 untailored arms). A reminder for this vaccination intention assessment is sent to non-  
12 responders after one day.  
13  
14  
15  
16  
17  
18  
19  
20  
21  
22  
23  
24  
25  
26  
27  
28  
29  
30

### 31 Untailored Intervention

32  
33 To isolate the impact that message tailoring has on mothers' vaccination attitudes and  
34 behavior, the primary comparator group in the study is a website that is similarly constructed as  
35 the VAYB website but lacks tailored elements. Specifically, the untailored intervention has  
36 similar text, content and design as the VAYB intervention, but is not linked to survey responses  
37 to make the messages individually customized (Figure 2B). This means that each participant in  
38 this arm receives identical content, messages, text and images. For example, instead of name-  
39 tailoring, the text uses generic references such as "you" and "your child". The recommended  
40 vaccine schedule is static in the untailored site compared to the tailored site which highlights  
41 upcoming vaccines based on the child's age. The order of content displayed is fixed throughout  
42 the study period as there is no linkage of the website's text to participants' values or attitudes.  
43  
44  
45  
46  
47  
48  
49  
50  
51  
52  
53  
54  
55  
56  
57  
58  
59  
60



1  
2  
3 In addition, the highly tailored “Just for You” tiles are not present in the untailed  
4  
5 intervention. The same questionnaires administered to participants in the VAYB arm are  
6  
7 administered to participants in the untailed arm, but the material is not used to refresh the  
8  
9 website content  
10  
11  
12  
13  
14

### 15 Usual Care

16  
17 After taking the Pre-Intervention Questionnaire that is used to determine randomization,  
18  
19 participants in the usual care arm are thanked for their information and logged off the study  
20  
21 website. They receive an email containing their gift card and are mailed the Vaccine  
22  
23 Information Statements for the vaccines due in the child’s first year of life. They do not have  
24  
25 access to the VAYB or untailed websites used for the other arms of the study but do receive  
26  
27 the same interim questionnaires at the same time periods as the VAYB and untailed arms  
28  
29 (see Table 2). They continue their usual care and their infant’s vaccination status is assessed  
30  
31 prospectively when their child turns 200 days old (primary outcome) and again when their child  
32  
33 is age 489 days (secondary outcome).  
34  
35  
36  
37  
38  
39  
40  
41

42 Routine pediatric care is available to infants of all participants in the study. At KPCO, usual care  
43  
44 typically consists of a series of pediatric, well-child care visits at 2 weeks, 2 months, 4 months, 6  
45  
46 months, and 12 months of age, with an optional visit at 9 months of age if desired by the  
47  
48 healthcare provider or parent. Visit content is structured based on the Bright Futures program  
49  
50 of American Academy of Pediatrics, which provides detailed guidelines regarding the content  
51  
52 and schedule of pediatric health supervision visits.<sup>36</sup> The visit content is intentionally broad,  
53  
54  
55  
56  
57  
58  
59  
60

1  
2  
3 with visits focused on the needs of the child and family that typically last 20 minutes or less.  
4  
5 Based on data in the EHR, a pre-visit informational sheet lists the vaccines recommended at  
6  
7 that visit. Parents are also provided with the VISs relevant to that visit. Providers are often  
8  
9 asked about vaccination, and can provide additional information verbally, although the small  
10  
11 window of time available for visits can limit discussion.  
12  
13  
14  
15  
16  
17

## 18 Outcomes

19  
20  
21 The primary outcome of the study is a dichotomous categorization of vaccination status (up-to-  
22  
23 date vs. not up-to-date) that is defined based on a continuous measure of days under-  
24  
25 vaccinated. This outcome is assessed at 200 days of age to cover vaccines in the initial infant  
26  
27 vaccination series and to minimize the loss to follow-up. The following 6 vaccines  
28  
29 recommended by the Advisory Committee on Immunization Practices will be assessed: hepatitis  
30  
31 B; rotavirus; diphtheria-tetanus-acellular pertussis; Haemophilus influenzae type b;  
32  
33 pneumococcal conjugate vaccine; and polio. All vaccination data is obtained from KPCO's EMR  
34  
35  
36  
37  
38  
39  
40  
41  
42  
43  
44  
45  
46  
47  
48  
49  
50  
51  
52  
53  
54  
55  
56  
57  
58  
59  
60  
CIIS.

To categorize vaccination status we will first assess the number of days under-vaccinated for  
the 2- and 4-month vaccines (combined), by calculating the difference between when a vaccine  
dose was actually administered and when a vaccine dose should have been administered  
according to the vaccination schedule recommended by the Advisory Committee on  
Immunization Practices,<sup>37</sup> plus an additional 30 day "leeway" to account for vaccination that did

1  
2  
3 not occur at exactly the minimal interval between doses. For example, the first dose of  
4 rotavirus vaccine is due at age 2 months (61 days) but is not considered late until age 92 days.  
5  
6 Days undervaccinated for this dose begin accruing on day 93. The number of days under-  
7 vaccinated is then summed across all doses and vaccines to calculate a total number of days  
8 under-vaccinated for each infant and can range from 0-648 days. Infants with 0 total days  
9 undervaccinated (assessed specifically for the 2 and 4 months vaccines) at 200 days will be  
10 considered up-to-date on their vaccination status; Those with  $\geq 1$  days undervaccinated  
11 (representing at least a 30-day delay for at least 1 vaccine) will be considered not up-to-date.  
12  
13  
14  
15  
16  
17  
18  
19  
20  
21  
22  
23  
24  
25

26 A secondary vaccination metric that is assessed is up-to-date status for measles-mumps-rubella  
27 (MMR) and varicella vaccine at 489 days, when delay for the first dose of these vaccines begins.  
28  
29 This metric is useful because it incorporates outcomes related to parents' decision-making  
30 about these two vaccines recommended at 12-15 months of age that are not offered  
31 previously.  
32  
33  
34  
35  
36  
37  
38  
39  
40

41 The interventions' impact over time on a variety of additional secondary outcomes that are  
42 based on the constructs of our conceptual behavioral model (Figure 1) and assessed as part of  
43 the baseline and interim questionnaires will also be assessed. These include changes over time  
44 in vaccination attitudes and hesitancy, and how these relate to study arm, vaccination values,  
45 and vaccination status. Vaccination attitudes are assessed using measures previously developed  
46 by our team and others,<sup>32</sup> values are assessed using a novel vaccination values framework we  
47 have developed (manuscript in preparation), and vaccine hesitancy is assessed using a 5-item  
48  
49  
50  
51  
52  
53  
54  
55  
56  
57  
58  
59  
60

1  
2  
3 validated measure developed by (Opel, personal communication). A variety of covariates and  
4  
5 potential moderators will be assessed as part of this analysis including patient age, gender and  
6  
7 insurance (some patients have Medicaid KPCO coverage), and mother's age, race, and ethnicity.  
8  
9 Also included will be metrics measuring website engagement (VAYB and Untailored arms only)  
10  
11 including time spent on the website, number of times viewing website, number and order of  
12  
13 pages viewed, and match between stated concerns and website material viewed (VAYB arm  
14  
15 only).  
16  
17  
18  
19  
20  
21  
22

### 23 **Data Collection Methods**

24  
25  
26 Vaccination data is collected routinely as part of clinical care within the KPCO health system and  
27  
28 will be assessed from the KPCO EMR data warehouse at pre-defined ages (200 days and 489  
29  
30 days). CIIS will be used as a secondary vaccination data source, though internal audits  
31  
32 demonstrate that >95% of childhood vaccines given to KPCO patients are captured within the  
33  
34 EMR. Survey data are collected on the internet based on user responses to the online  
35  
36 questionnaires.  
37  
38  
39  
40  
41  
42  
43

### 44 **Participant retention**

45  
46  
47 To assist with retention, participants receive a \$20 gift card incentive for each survey they  
48  
49 complete. However, even with this incentive we expect some drop off in survey participation.  
50  
51 Because our primary outcome is vaccination status, mothers who do not participate in all the  
52  
53 study surveys are still able to have the primary study outcome assessed, so long as their child  
54  
55  
56  
57  
58  
59  
60

1  
2  
3 maintains coverage and continues to seek care within the KPCO health system. Based on past  
4  
5 studies, we expect that the proportion of mothers who discontinue KPCO coverage after the  
6  
7 birth of their infant to be ~15%, and our study is powered with this attrition in mind.<sup>35</sup>  
8  
9

#### 10 11 12 13 14 Data security and storage

15  
16 To ensure that the data are protected, several methods are used. Personal identifying data  
17  
18 collected on study websites is limited to a participant generated username, email address, and  
19  
20 child birthdate. The only other data collected on the study websites are vaccine attitudes,  
21  
22 beliefs, values and demographics. The study websites use virtualized servers housed at  
23  
24 redundant data centers and access is password protected. Virtual servers are backed up  
25  
26 automatically onto encrypted tape for recovery and security. Data provided to researchers from  
27  
28 the website are encrypted if they are transmitted across the Internet. Data use agreements are  
29  
30 in place across all study team member sites.  
31  
32  
33  
34  
35  
36  
37  
38  
39  
40

41 All medical record data are collected and stored at KPCO behind the firewall in secure password  
42  
43 protected files. This dataset is linked to a study ID. A limited dataset devoid of personal  
44  
45 identifying information will be used for data analyses. Data will be shared with study team  
46  
47 members through a secure file transfer. Only members of KPCO research project team have  
48  
49 access to the personal identifiers linking the study IDs to specific study participants.  
50  
51  
52  
53  
54  
55  
56  
57  
58  
59  
60

## Statistical Methods

Total days undervaccinated will be analyzed primarily as a dichotomous variable (up-to-date vaccination status) and secondarily as a continuous measure. Categorically defined up-to-date vaccination status will be analyzed using logistic regression to estimate odds ratios and associated 95% confidence intervals. For the continuous measure, because total days undervaccinated has a highly skewed distribution, we will use a nonparametric analysis and a rank transformation approach. For both measures, we will conduct analyses stratified by baseline vaccine hesitancy.

For survey measures, descriptive statistics will be assessed and changes in vaccination attitudes and intention over time will be calculated. All measures are assessed using Likert scales and will be analyzed as linear measures. Repeated measures ANOVA will be used to assess the intervention's impact on average change by arm for each of these outcomes. Mixed linear models will be used to assess the "difference in difference" over time in these means, by arm, controlling for the covariates described above. Website utilization data will be measured primarily using linear measures (time spent on the website in minutes, number of times logging in, number of web pages viewed etc.) and may be included in the mixed linear models. ANOVA will be used to assess the association between each of these website utilization measures and study arm.

## Analytic framework

We will use a modified intention to treat framework for the analysis of vaccination outcomes.

This analytic cohort will include infants of all randomized mothers who maintained KPCO health coverage for the allotted amount of time (200 days for the primary outcome, 489 days for the secondary outcome) with no more than 90 days of no coverage, and thus have vaccination data available for assessment. For survey outcomes, we will use a modified intention to treat analysis that includes all participants with data from at least one non-baseline questionnaire.

## Missing data

As described above, nearly all vaccines provided to KPCO patients are documented in the EMR, and doses provided outside KPCO are documented in CIIS. Therefore, we expect there to be minimal missing data for vaccination outcomes. To ensure the most complete record, CIIS will be cross checked for all participants to identify any vaccine doses given to infants outside the KPCO system that are missing from the KPCO EMR. Participants who do not have vaccination data present in either system will be assumed to have not gotten a vaccine dose elsewhere.

For survey data, due to our recruitment strategy, we anticipate no missing data at baseline, as completion of the baseline survey was a criterion for entry into the study. However, there may be missing data for subsequent surveys as these were not required to remain in the study. For missing data in surveys beyond baseline, multiple imputation models will be developed for

1  
2  
3 analyses involving multiple survey points where greater than 10% of subjects would be lost due  
4  
5 to missing values.  
6  
7  
8  
9

## 10 11 12 Subgroup analyses 13

14  
15 The main subgroup analysis planned is examining the efficacy of our intervention by vaccine  
16  
17 hesitancy status (dichotomous variable), as defined by the 5 item Opel measure described  
18  
19 above.  
20  
21  
22  
23  
24  
25

## 26 27 28 **Monitoring**

29 KPCO EMR data on participants and their infants will be used to identify any deaths or loss of  
30  
31 KPO insurance coverage, which are subsequently chart reviewed for accuracy. Participants who  
32  
33 die or experienced an infant death, or have >90 days loss of insurance coverage, will be  
34  
35 removed from the study and will not be included in the modified intention to treat analysis. All  
36  
37 participants will be monitored weekly for completion of the various surveys in the study and  
38  
39 reminder emails will be sent on a pre-set schedule to those who have not completed them.  
40  
41  
42 However, failure to complete any surveys beyond the baseline survey will not be cause for  
43  
44 removal from the study.  
45  
46  
47  
48  
49  
50  
51

## 52 53 54 55 56 57 58 59 60 Assessment of Harms and AEs



1  
2  
3 Study participants are provided with contact information for the research team and encouraged  
4  
5 to contact the team if they experience any adverse events related to their participation in the  
6  
7 study (e.g. being contacted after an infant death). Adverse events are expected to be very  
8  
9 unlikely given the nature of the study and our monitoring procedures. However, should any  
10  
11 significant adverse events occur, they will be reported to the appropriate institutional  
12  
13  
14  
15 authorities.

## 21 **Ethics and Dissemination**

### 24 Approvals

25  
26  
27  
28 This study is approved by the Institutional Review Boards at the University of Colorado, and  
29  
30 KPCO.

### 36 Informed consent

37  
38  
39 All mothers in the study are informed about the study, the risks and benefits and provide  
40  
41 written informed consent via an on-line registration process prior to participating in the study.  
42  
43  
44 As part of the consent process participants are informed that they may withdraw from the  
45  
46 study at any time without impacting their clinical treatment.  
47  
48  
49  
50  
51  
52

### 53 Access to data

54  
55  
56  
57  
58  
59  
60

1  
2  
3 The data will be accessed only by authorized persons directly involved in the study from the  
4  
5 University of Colorado Denver, KPCO and University of Michigan. Access to a de-identified,  
6  
7 aggregated version of the dataset and analysis code will be available upon request and approval  
8  
9 of the study team  
10  
11  
12  
13  
14  
15

### 16 17 Competing Financial Interests

18  
19  
20 Amanda Dempsey serves on advisory boards for Merck, Pfizer, and Sanofi and as a consultant  
21  
22 for Pfizer. She does not receive any research funding from these companies and they played no  
23  
24 role in this project. All other research team members have no competing financial interests to  
25  
26 declare.  
27  
28  
29  
30  
31  
32

### 33 34 Dissemination Plans

35  
36 Results of the study will be presented at national and international research conferences and  
37  
38 through peer-reviewed publications. Any changes to the study protocol will be clearly  
39  
40 communicated to journals publishing the study results in a manner that aligns with the journal's  
41  
42 policies for reporting clinical trials. CONSORT guidelines<sup>38</sup> will be followed when reporting study  
43  
44 outcomes. Study materials such as questionnaires and screenshots of the intervention  
45  
46 websites will be available to researchers upon request from the study Principal Investigators. If  
47  
48 the VAYB intervention proves to be efficacious in reducing delays in the timeliness of infant  
49  
50  
51  
52  
53  
54  
55  
56  
57  
58  
59  
60

1  
2  
3 vaccination, the study team will work with web-developers and community organizations to  
4  
5 explore options to make the website available to the general public.  
6  
7  
8  
9  
10

## 11 Patient and Public Involvement

12  
13  
14  
15 Patients were first involved in this research when designing the intervention, which is informed  
16  
17 by the literature, and by the research teams prior clinical and research experience. The bulk of  
18  
19 patient involvement was as research participants. They will not be involved in recruitment or  
20  
21 conduct of the study, data analysis, or dissemination.  
22  
23  
24  
25  
26  
27  
28  
29  
30  
31  
32  
33  
34  
35  
36  
37  
38  
39  
40  
41  
42  
43  
44  
45  
46  
47  
48  
49  
50  
51  
52  
53  
54  
55  
56  
57  
58  
59  
60

### Figure Legends

Figure 2: The right arrow denotes the “Just for You” tiles that represent the most highly tailored content on the VAYB website. The left arrow denotes additional text reflecting lightly tailored material that is particularly salient to the participant based on their survey responses.

For peer review only

Table 1. Trial Registration Dataset Summary Table

| Data Category                        | Information                                                                                                                                                                                                                                                                                                                                                                                    |
|--------------------------------------|------------------------------------------------------------------------------------------------------------------------------------------------------------------------------------------------------------------------------------------------------------------------------------------------------------------------------------------------------------------------------------------------|
| Registry and trial number            | ClinicalTrials.gov - NCT02665013                                                                                                                                                                                                                                                                                                                                                               |
| Data of registration                 | 1/4/2016                                                                                                                                                                                                                                                                                                                                                                                       |
| Secondary identifying numbers        | CO-IRB #: CO-15-2299_07                                                                                                                                                                                                                                                                                                                                                                        |
| Financial Support                    | National Institutes of Health                                                                                                                                                                                                                                                                                                                                                                  |
| Contact for queries                  | <a href="mailto:Amanda.dempsey@ucdenver.edu">Amanda.dempsey@ucdenver.edu</a>                                                                                                                                                                                                                                                                                                                   |
| Title                                | The REDIVAC study-Reducing Delay in the Vaccination of Children                                                                                                                                                                                                                                                                                                                                |
| Countries of Recruitment             | United States                                                                                                                                                                                                                                                                                                                                                                                  |
| Health condition studied             | Infant vaccination                                                                                                                                                                                                                                                                                                                                                                             |
| Interventions                        | Active comparator – tailored educational website<br>Placebo comparator – untailored educational website<br>Passive comparator – usual care                                                                                                                                                                                                                                                     |
| Key inclusion and exclusion criteria | <u>Inclusion:</u> ≥18 years, pregnant in 3 <sup>rd</sup> trimester or child <2 months of age, receives care at KPCO health system, able to read English, access to the internet.<br><u>Exclusion:</u> high risk maternal or fetal health condition, maternal social issues (such as abuse), fetal or infant death, does not plan to have infant receive care in KPCO health system after birth |

|                          |                                                                          |
|--------------------------|--------------------------------------------------------------------------|
| Study type               | Individually randomized, controlled trial                                |
| Date of first enrollment | 4/20/2016                                                                |
| Target sample size       | 700                                                                      |
| Trial status             | Ongoing data collection                                                  |
| Primary outcomes         | Average days undervaccinated;<br>Up to date vaccination status           |
| Key Secondary Outcomes   | Vaccination attitudes;<br>Vaccination values;<br>Vaccine hesitancy level |

**Table 2. Timing and Content of Study Questionnaires**

| Timing                                                | Rationale                                                                                                                                                                                                                                                   | Content                                                                                                                                  |
|-------------------------------------------------------|-------------------------------------------------------------------------------------------------------------------------------------------------------------------------------------------------------------------------------------------------------------|------------------------------------------------------------------------------------------------------------------------------------------|
| Last trimester of pregnancy or child <2 months of age | Pre-intervention questionnaire required for study enrollment. Our prior research indicates infant vaccination decisions are actively forming among expectant mothers.                                                                                       | Intention to vaccinate<br>Vaccination values<br>Vaccination attitudes<br>Logistical barriers<br>Vaccine hesitancy status<br>Demographics |
| At child age 4 to 6 months                            | First round of infant vaccines is typically provided at age 2, 4 and 6 months. The same vaccines are given at each visit.                                                                                                                                   | Intention to vaccinate<br>Vaccination attitudes<br>Logistical barriers<br>Vaccine hesitancy (only 3 of 5 Qs)                             |
| At child age 10 – 12 months                           | The same vaccines are provided at 2, 4 and 6 months of age, thus decisions made at the two-month visit are likely to be followed for 4 and 6-month vaccines. However, several new vaccines are introduced at the 1-year visit. Vaccine-hesitant parents are | Intention to vaccinate<br>Vaccination values<br>Vaccination attitudes<br>Logistical barriers<br>Vaccine hesitancy status                 |

|                  |                                                                                                            |                                                                                |
|------------------|------------------------------------------------------------------------------------------------------------|--------------------------------------------------------------------------------|
|                  | likely to need additional, new information for making decisions about the vaccines provided at age 1 year. |                                                                                |
| Age 13-15 months | End of study assessment to track changes over crucial time periods of vaccine decision-making              | Vaccination attitudes<br>Vaccine hesitancy status<br>Satisfaction with website |



Table 3 Examples of VAYB Website Content for Two Topics, Showing Tailoring Based on Three Different Values

| <b>Vaccines and Your Baby: Tailored Messages</b> |                                                                                                                                                                                                                                                                                            |                                                                                                                  |
|--------------------------------------------------|--------------------------------------------------------------------------------------------------------------------------------------------------------------------------------------------------------------------------------------------------------------------------------------------|------------------------------------------------------------------------------------------------------------------|
| <b>Value</b>                                     | <b>Topics</b>                                                                                                                                                                                                                                                                              |                                                                                                                  |
|                                                  | <b>“Alternative /Delayed Vaccine Schedules” Message</b>                                                                                                                                                                                                                                    | <b>“Doing your own Research on Vaccines” Message</b>                                                             |
| <b>Security – Disease Prevention</b>             | Like many parents, your main goal is to keep your child healthy. The last thing you want is for your child to get an illness you could have prevented with a simple vaccine.                                                                                                               | You're the kind of person who will do everything she can to protect her baby from illnesses.                     |
| <b>Self-Direction</b>                            | You're not one to just do what other people tell you to do. You know your child better than anyone, and you have choices to make. You want to do your own research about vaccines. You don't want him/her to get a disease. But you don't want to put him/her at risk by getting vaccines. | You're the kind of person who plays an active role in decisions about her baby's health.                         |
| <b>Security – Vaccine Risk</b>                   | That's a lot of needles (and a lot of tears)! You want to protect your child. But with so many vaccines at once, you're concerned about exposing him/her to too many unnatural ingredients all at once.                                                                                    | You're the kind of person who will do everything she can to protect her baby from pain or unnecessary medicines. |

1  
2  
3 Author Statement.

4 Amanda Dempsey conceived of the study and intervention, and wrote the first draft of the  
5  
6  
7 manuscript.t.  
8  
9

10  
11  
12  
13  
14 Nicole Wagner provided input into the study design, intervention development, and study  
15  
16 protocol, and edited versions of the manuscript.  
17  
18

19  
20  
21  
22 Komal Narwaney provided input into the study design, intervention development, and study  
23  
24 protocol, and edited versions of the manuscript.  
25  
26

27  
28  
29  
30  
31 Jennifer Pyrzanowski provided input into the study design, intervention development, and  
32  
33 study protocol, and edited versions of the manuscript.  
34  
35

36  
37  
38  
39  
40 Bethany M Kwan provided input into the study design, intervention development, and study  
41  
42 protocol, and edited versions of the manuscript.  
43  
44

45  
46  
47  
48 Courtney Kraus provided input into the study design, intervention development, and study  
49  
50 protocol, and edited versions of the manuscript.  
51  
52

1  
2  
3 Kathy Gleason provided input into the study design, intervention development, and study  
4  
5 protocol, and edited versions of the manuscript.  
6  
7  
8  
9

10  
11  
12 Ken Resincow provided input into the study design, intervention development, and study  
13  
14 protocol, and edited versions of the manuscript.  
15  
16  
17

18  
19  
20 carter sevick provided input into the study design, intervention development, and study  
21  
22 protocol, and edited versions of the manuscript.  
23  
24  
25

26  
27  
28  
29 Jessica Cataldi provided input into the study design, intervention development, and study  
30  
31 protocol, and edited versions of the manuscript.  
32  
33  
34

35  
36  
37  
38 Sarah E Brewer provided input into the study design, intervention development, and study  
39  
40 protocol, and edited versions of the manuscript.  
41  
42  
43

44  
45  
46 Jason M Glanz provided input into the study design, intervention development, and study  
47  
48 protocol, and edited versions of the manuscript.  
49  
50  
51

52  
53  
54  
55 Funding Statement:  
56  
57  
58

1  
2  
3 This work was funded by the National Institutes of Health, Eunice Kennedy Shriver National  
4  
5  
6 Institute of Child Health and Human Development, # R01HD079457.  
7  
8  
9

10  
11  
12 Competing Interests:

13  
14  
15 Amanda Dempsey serves on Advisory Boards for Merck, Pfizer and Sanofi Pasteur, and has  
16  
17 provided consulting services to Pfizer. She does not receive any research funding from these  
18  
19 companies. All other authors have no competing interests to declare.  
20  
21  
22  
23  
24  
25  
26  
27  
28  
29  
30  
31  
32  
33  
34  
35  
36  
37  
38  
39  
40  
41  
42  
43  
44  
45  
46  
47  
48  
49  
50  
51  
52  
53  
54  
55  
56  
57  
58  
59  
60

## REFERENCES

1. Roush SW, Murphy TV, Vaccine-Preventable Disease Table Working G. Historical comparisons of morbidity and mortality for vaccine-preventable diseases in the United States. *Jama*. 2007;298(18):2155-2163.
2. Omer SB, Pan WK, Halsey NA, et al. Nonmedical exemptions to school immunization requirements: secular trends and association of state policies with pertussis incidence. *Jama*. 2006;296(14):1757-1763.
3. Glanz JM, Newcomer SR, Narwaney KJ, et al. A population-based cohort study of undervaccination in 8 managed care organizations across the United States. *JAMA pediatrics*. 2013;167(3):274-281.
4. Omer SB, Salmon DA, Orenstein WA, deHart MP, Halsey N. Vaccine refusal, mandatory immunization, and the risks of vaccine-preventable diseases. *The New England journal of medicine*. 2009;360(19):1981-1988.
5. Siddiqui M, Salmon DA, Omer SB. Epidemiology of vaccine hesitancy in the United States. *Human vaccines & immunotherapeutics*. 2013;9(12):2643-2648.
6. National Vaccine Advisory Committee. Assessing the state of vaccine confidence in the United States: recommendations from the National Vaccine Advisory Committee. *Pub Health Rep*. 2015;130:573-595.
7. Trivedi D. Cochrane review summary: Face-to-face interventions for informing or educating parents about early childhood vaccination. *Prim Health Care Res Dev*. 2014;15(4):339-341.
8. Sadaf A, Richards JL, Glanz J, Salmon DA, Omer SB. A systematic review of interventions for reducing parental vaccine refusal and vaccine hesitancy. *Vaccine*. 2013;31(40):4293-4304.
9. Connors JT, Slotwinski KL, Hodges EA. Provider-parent Communication When Discussing Vaccines: A Systematic Review. *Journal of pediatric nursing*. 2016.
10. MacDonald NE. Vaccine hesitancy: Definition, scope and determinants. *Vaccine*. 2015;33(34):4161-4164.
11. Dube E, Vivion M, MacDonald NE. Vaccine hesitancy, vaccine refusal and the anti-vaccine movement: influence, impact and implications. *Expert review of vaccines*. 2015;14(1):99-117.
12. Opel DJ, Marcuse EK. Window or mirror: social networks' role in immunization decisions. *Pediatrics*. 2013;131(5):e1619-1620.
13. Opel DJ, Heritage J, Taylor JA, et al. The architecture of provider-parent vaccine discussions at health supervision visits. *Pediatrics*. 2013;132(6):1037-1046.
14. Hough-Telford C, Kimberlin DW, Aban I, et al. Vaccine Delays, Refusals, and Patient Dismissals: A Survey of Pediatricians. *Pediatrics*. 2016;138(3).
15. MacDonald NE, Butler R, Dube E. Addressing barriers to vaccine acceptance: an overview. *Human vaccines & immunotherapeutics*. 2017:0.
16. Hawkins RP, Kreuter M, Resnicow K, Fishbein M, Dijkstra A. Understanding tailoring in communicating about health. *Health education research*. 2008;23(3):454-466.
17. Kreuter MW, Strecher VJ, Glassman B. One size does not fit all: the case for tailoring print materials. *Annals of behavioral medicine : a publication of the Society of Behavioral Medicine*. 1999;21(4):276-283.
18. Noar SM, Benac CN, Harris MS. Does tailoring matter? Meta-analytic review of tailored print health behavior change interventions. *Psychol Bull*. 2007;133(4):673-693.
19. I A. The theory of planned behavior. *Organiz Behavior and Human Dec Processes*. 1991;50(2):179-211.

20. Homer P, Kahle LR. A structural equation test of the value-attitude-behavior hierarchy. *J Personality Soc Psychol*. 1988;54(4):638.
21. McCain J. To Heal the Body, Get Into the Patient's Head: Motivational Interviewing: To improve adherence. *Biotechnol Healthc*. 2012;9(4):10-12.
22. Sweeney AM, Moyer A. Self-affirmation and responses to health messages: A meta-analysis on intentions and behavior. *Health psychology : official journal of the Division of Health Psychology, American Psychological Association*. 2015;34(2):149-159.
23. Flannery M. Self-Determination Theory: Intrinsic Motivation and Behavioral Change. *Oncology nursing forum*. 2017;44(2):155-156.
24. Rollnick WRMaS. *Motivational Interviewing: Preparing People to Change Addictive Behavior*. New York: Guilford Press 1991.
25. Boer D FR. How and when do personal values guide our attitudes and sociality? Explaining cross-cultural variability in attitude-value linkages. *Psychol Bull*. 2013;139(5):1113-1147.
26. Shim S MJ. A cognitive and behavioral hierarchical decision-making model of college students' alcohol consumption. *Psychol and Marketing*. 2005;22(8):649-668.
27. Homer PM, Kahle LR. A structural equation test of the value-attitude-behavior hierarchy. *Journal of Personality and social Psychology*. 1988;54(4):638.
28. Boer D, Fischer R. How and when do personal values guide our attitudes and sociality? Explaining cross-cultural variability in attitude-value linkages. *Psychol Bull*. 2013;139(5):1113-1147.
29. Shim S, Maggs J. A cognitive and behavioral hierarchical decision-making model of college students' alcohol consumption. *Psychology & Marketing*. 2005;22(8):649-668.
30. Glanz JM, Kraus CR, Daley MF. Addressing Parental Vaccine Concerns: Engagement, Balance, and Timing. *PLoS biology*. 2015;13(8):e1002227.
31. O'Leary ST, Brewer SE, Pyrzanowski J, et al. Timing of Information-Seeking about Infant Vaccines. *The Journal of pediatrics*. 2018.
32. JA S. Concerns, Attitudes, Beliefs and Intentions of Parents about Vaccines for their Child. In. Denver, CO: School of Public Affairs, University of Colorado Denver; 2015.
33. Kwan B, Dempsey, AF, Cataldi, J, Pyrzanowski, J, Sevick, C, Narwaney, K, Glanz, J, Wagner, N. The relationship between parental values and attitudes towards childhood vaccination: informing tailored interventions. Paper presented at: Society of Behavioral Medicine 2016; Washington, DC.
34. Cataldi J, Sevick, C, Wagner, N, Pyrzanowski, J, Narwaney, K, Glanz, J, Dempsey A, Kwan, B. Personal values: A new target for addressing vaccine hesitancy? Paper presented at: Pediatric Academic Societies 2016; Baltimore, MD.
35. Daley MF, Narwaney KJ, Shoup JA, Wagner NM, Glanz JM. Addressing Parents' Vaccine Concerns: A Randomized Trial of a Social Media Intervention. *American journal of preventive medicine*. 2018.
36. *Bright Futures: Guidelines for Health Supervision of Infants, Children, and Adolescents. 2nd ed. Revised*. Arlington, VA: National Center for Education in maternal and Child Health; 2002.
37. Robinson CL, Romero JR, Kempe A, Pellegrini C. Advisory Committee on Immunization Practices Recommended Immunization Schedule for Children and Adolescents Aged 18 Years or Younger - United States, 2017. *MMWR Morbidity and mortality weekly report*. 2017;66(5):134-135.
38. Moher D, Hopewell S, Schulz KF, et al. CONSORT 2010 explanation and elaboration: updated guidelines for reporting parallel group randomised trials. *International journal of surgery (London, England)*. 2012;10(1):28-55.

**FIGURE LEGENDS**

Figure 1: Model of parental vaccine values, vaccine attitudes, hesitancy and behavior

Figure 2. (a) "Landing page" of the VYB website annotated to highlight various types of message tailoring. The right arrow denotes the "Just for You" tiles that represent the most highly tailored content on the VAYB website. The left arrow denotes additional text reflecting lightly tailored material that is particularly salient to the participant based on their survey responses.. (b) Landing page of corresponding untailored website that lacks message tailoring

1  
2  
3 **Figure 1:** Model of parental vaccine values, vaccine attitudes, hesitancy and behavior  
4  
5  
6  
7  
8  
9





Figure 2: Screenshots of the Tailored and Untailored Intervention Websites

A. Tailored Website

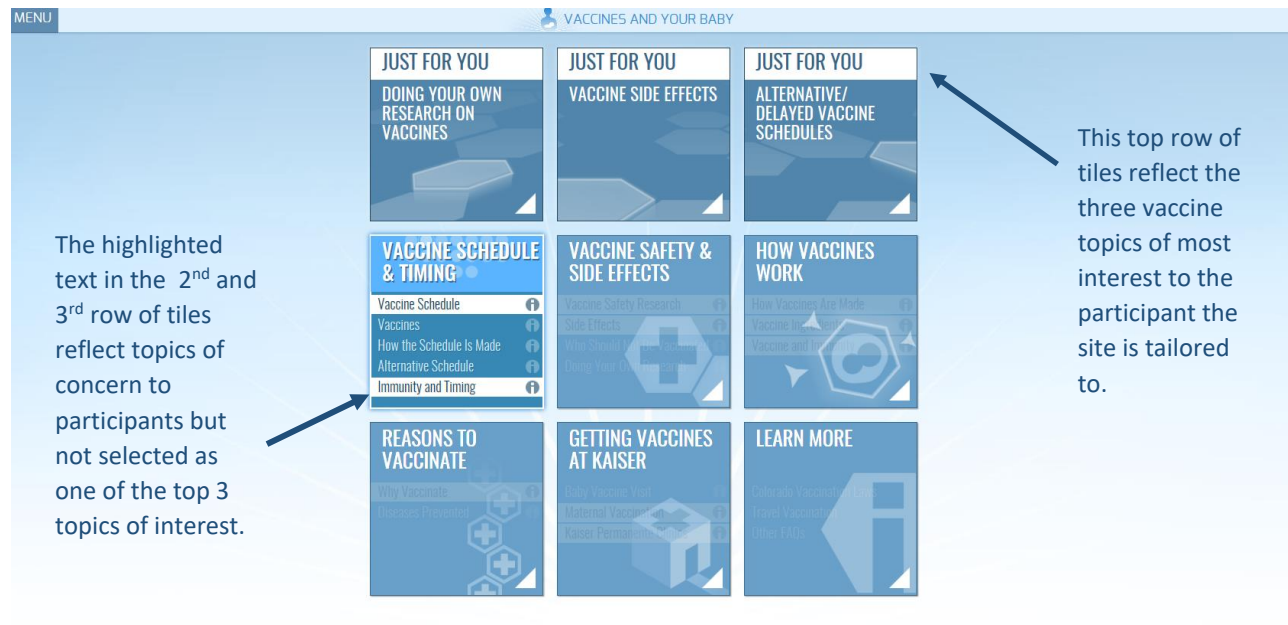

The highlighted text in the 2<sup>nd</sup> and 3<sup>rd</sup> row of tiles reflect topics of concern to participants but not selected as one of the top 3 topics of interest.

This top row of tiles reflect the three vaccine topics of most interest to the participant the site is tailored to.

B. Untailored Website

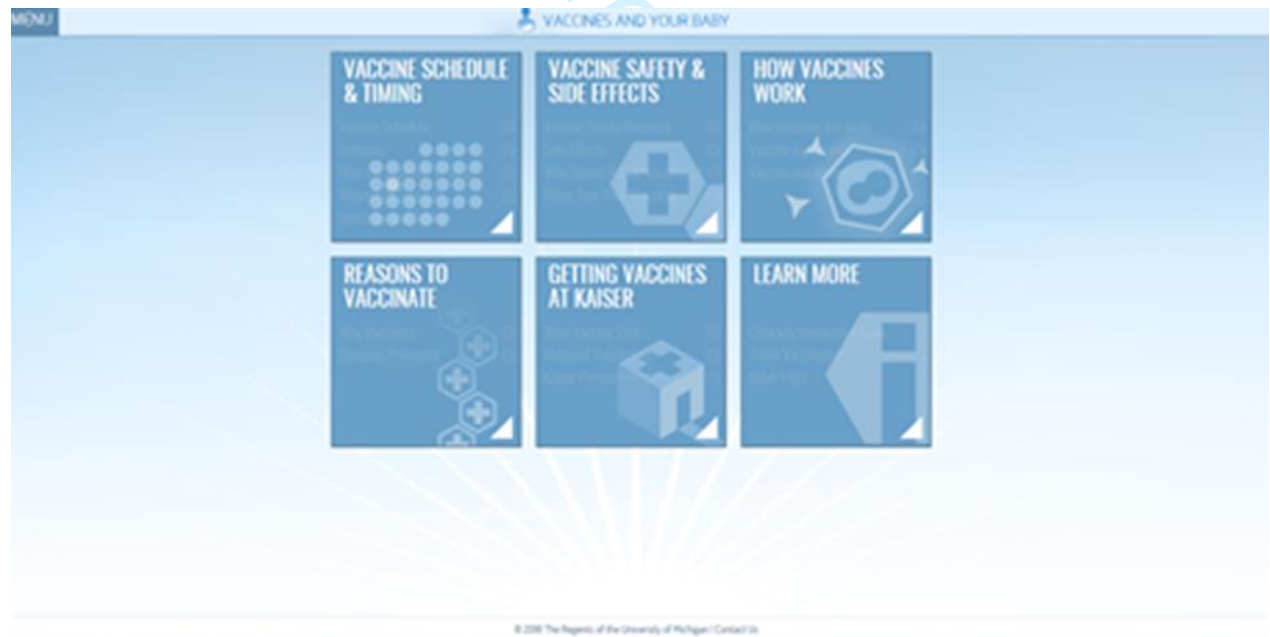

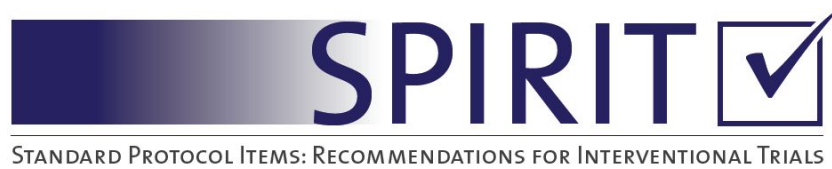

STANDARD PROTOCOL ITEMS: RECOMMENDATIONS FOR INTERVENTIONAL TRIALS

**The “Reducing Delays In Vaccination” (REDIVAC) Trial: A protocol for a randomized controlled trial of a web-based, individually tailored, educational intervention to improve timeliness of infant vaccination**

| Section/item                      | Item No | Description                                                                                                                                                                                                                                                                              | Page Number on which item is reported |
|-----------------------------------|---------|------------------------------------------------------------------------------------------------------------------------------------------------------------------------------------------------------------------------------------------------------------------------------------------|---------------------------------------|
| <b>Administrative information</b> |         |                                                                                                                                                                                                                                                                                          |                                       |
| Title                             | 1       | Descriptive title identifying the study design, population, interventions, and, if applicable, trial acronym                                                                                                                                                                             | 1                                     |
| Trial registration                | 2a      | Trial identifier and registry name. If not yet registered, name of intended registry                                                                                                                                                                                                     | 3, 8                                  |
|                                   | 2b      | All items from the World Health Organization Trial Registration Data Set                                                                                                                                                                                                                 | n/a                                   |
| Protocol version                  | 3       | Date and version identifier                                                                                                                                                                                                                                                              | 1                                     |
| Funding                           | 4       | Sources and types of financial, material, and other support                                                                                                                                                                                                                              | 34                                    |
| Roles and responsibilities        | 5a      | Names, affiliations, and roles of protocol contributors                                                                                                                                                                                                                                  | 1, 34                                 |
|                                   | 5b      | Name and contact information for the trial sponsor                                                                                                                                                                                                                                       | n/a                                   |
|                                   | 5c      | Role of study sponsor and funders, if any, in study design; collection, management, analysis, and interpretation of data; writing of the report; and the decision to submit the report for publication, including whether they will have ultimate authority over any of these activities | n/a                                   |
|                                   | 5d      | Composition, roles, and responsibilities of the coordinating centre, steering committee, endpoint adjudication committee, data management team, and other individuals or groups overseeing the trial, if applicable (see Item 21a for data monitoring committee)                         | n/a                                   |
| <b>Introduction</b>               |         |                                                                                                                                                                                                                                                                                          |                                       |

|                                                           |     |                                                                                                                                                                                                                                                                                                                                                                                |       |
|-----------------------------------------------------------|-----|--------------------------------------------------------------------------------------------------------------------------------------------------------------------------------------------------------------------------------------------------------------------------------------------------------------------------------------------------------------------------------|-------|
| Background and rationale                                  | 6a  | Description of research question and justification for undertaking the trial, including summary of relevant studies (published and unpublished) examining benefits and harms for each intervention                                                                                                                                                                             | 5-6   |
|                                                           | 6b  | Explanation for choice of comparators                                                                                                                                                                                                                                                                                                                                          | 15    |
| Objectives                                                | 7   | Specific objectives or hypotheses                                                                                                                                                                                                                                                                                                                                              | 8     |
| Trial design                                              | 8   | Description of trial design including type of trial (eg, parallel group, crossover, factorial, single group), allocation ratio, and framework (eg, superiority, equivalence, noninferiority, exploratory)                                                                                                                                                                      | 8-9   |
| <b>Methods: Participants, interventions, and outcomes</b> |     |                                                                                                                                                                                                                                                                                                                                                                                |       |
| Study setting                                             | 9   | Description of study settings (eg, community clinic, academic hospital) and list of countries where data will be collected. Reference to where list of study sites can be obtained                                                                                                                                                                                             | 9     |
| Eligibility criteria                                      | 10  | Inclusion and exclusion criteria for participants. If applicable, eligibility criteria for study centres and individuals who will perform the interventions (eg, surgeons, psychotherapists)                                                                                                                                                                                   | 10    |
| Interventions                                             | 11a | Interventions for each group with sufficient detail to allow replication, including how and when they will be administered                                                                                                                                                                                                                                                     | 13-16 |
|                                                           | 11b | Criteria for discontinuing or modifying allocated interventions for a given trial participant (eg, drug dose change in response to harms, participant request, or improving/worsening disease)                                                                                                                                                                                 | n/a   |
|                                                           | 11c | Strategies to improve adherence to intervention protocols, and any procedures for monitoring adherence (eg, drug tablet return, laboratory tests)                                                                                                                                                                                                                              | 19    |
|                                                           | 11d | Relevant concomitant care and interventions that are permitted or prohibited during the trial                                                                                                                                                                                                                                                                                  | n/a   |
| Outcomes                                                  | 12  | Primary, secondary, and other outcomes, including the specific measurement variable (eg, systolic blood pressure), analysis metric (eg, change from baseline, final value, time to event), method of aggregation (eg, median, proportion), and time point for each outcome. Explanation of the clinical relevance of chosen efficacy and harm outcomes is strongly recommended | 16-18 |

|                                                                     |     |                                                                                                                                                                                                                                                                                                                                                          |        |
|---------------------------------------------------------------------|-----|----------------------------------------------------------------------------------------------------------------------------------------------------------------------------------------------------------------------------------------------------------------------------------------------------------------------------------------------------------|--------|
| Participant timeline                                                | 13  | Time schedule of enrolment, interventions (including any run-ins and washouts), assessments, and visits for participants. A schematic diagram is highly recommended (see Figure)                                                                                                                                                                         | 18     |
| Sample size                                                         | 14  | Estimated number of participants needed to achieve study objectives and how it was determined, including clinical and statistical assumptions supporting any sample size calculations                                                                                                                                                                    | 13     |
| Recruitment                                                         | 15  | Strategies for achieving adequate participant enrolment to reach target sample size                                                                                                                                                                                                                                                                      | 11, 19 |
| <b>Methods: Assignment of interventions (for controlled trials)</b> |     |                                                                                                                                                                                                                                                                                                                                                          |        |
| Allocation:                                                         |     |                                                                                                                                                                                                                                                                                                                                                          |        |
| Sequence generation                                                 | 16a | Method of generating the allocation sequence (eg, computer-generated random numbers), and list of any factors for stratification. To reduce predictability of a random sequence, details of any planned restriction (eg, blocking) should be provided in a separate document that is unavailable to those who enrol participants or assign interventions | 12     |
| Allocation concealment mechanism                                    | 16b | Mechanism of implementing the allocation sequence (eg, central telephone; sequentially numbered, opaque, sealed envelopes), describing any steps to conceal the sequence until interventions are assigned                                                                                                                                                | 12     |
| Implementation                                                      | 16c | Who will generate the allocation sequence, who will enrol participants, and who will assign participants to interventions                                                                                                                                                                                                                                | 12     |
| Blinding (masking)                                                  | 17a | Who will be blinded after assignment to interventions (eg, trial participants, care providers, outcome assessors, data analysts), and how                                                                                                                                                                                                                | 12     |
|                                                                     | 17b | If blinded, circumstances under which unblinding is permissible, and procedure for revealing a participant's allocated intervention during the trial                                                                                                                                                                                                     | 12     |
| <b>Methods: Data collection, management, and analysis</b>           |     |                                                                                                                                                                                                                                                                                                                                                          |        |

|                                                          |                            |     |                                                                                                                                                                                                                                                                                                                                                                                                              |       |
|----------------------------------------------------------|----------------------------|-----|--------------------------------------------------------------------------------------------------------------------------------------------------------------------------------------------------------------------------------------------------------------------------------------------------------------------------------------------------------------------------------------------------------------|-------|
| 1<br>2<br>3<br>4<br>5<br>6<br>7<br>8<br>9<br>10<br>11    | Data collection methods    | 18a | Plans for assessment and collection of outcome, baseline, and other trial data, including any related processes to promote data quality (eg, duplicate measurements, training of assessors) and a description of study instruments (eg, questionnaires, laboratory tests) along with their reliability and validity, if known. Reference to where data collection forms can be found, if not in the protocol | 16-18 |
| 12<br>13<br>14<br>15<br>16<br>17                         |                            | 18b | Plans to promote participant retention and complete follow-up, including list of any outcome data to be collected for participants who discontinue or deviate from intervention protocols                                                                                                                                                                                                                    | 19    |
| 18<br>19<br>20<br>21<br>22<br>23<br>24<br>25             | Data management            | 19  | Plans for data entry, coding, security, and storage, including any related processes to promote data quality (eg, double data entry; range checks for data values). Reference to where details of data management procedures can be found, if not in the protocol                                                                                                                                            | 19    |
| 26<br>27<br>28<br>29<br>30<br>31                         | Statistical methods        | 20a | Statistical methods for analysing primary and secondary outcomes. Reference to where other details of the statistical analysis plan can be found, if not in the protocol                                                                                                                                                                                                                                     | 20-22 |
| 32<br>33<br>34                                           |                            | 20b | Methods for any additional analyses (eg, subgroup and adjusted analyses)                                                                                                                                                                                                                                                                                                                                     | 22    |
| 35<br>36<br>37<br>38<br>39<br>40                         |                            | 20c | Definition of analysis population relating to protocol non-adherence (eg, as randomised analysis), and any statistical methods to handle missing data (eg, multiple imputation)                                                                                                                                                                                                                              | 21    |
| 41<br>42                                                 | <b>Methods: Monitoring</b> |     |                                                                                                                                                                                                                                                                                                                                                                                                              |       |
| 43<br>44<br>45<br>46<br>47<br>48<br>49<br>50<br>51<br>52 | Data monitoring            | 21a | Composition of data monitoring committee (DMC); summary of its role and reporting structure; statement of whether it is independent from the sponsor and competing interests; and reference to where further details about its charter can be found, if not in the protocol. Alternatively, an explanation of why a DMC is not needed                                                                        | 22-23 |
| 53<br>54<br>55<br>56<br>57<br>58<br>59<br>60             |                            | 21b | Description of any interim analyses and stopping guidelines, including who will have access to these interim results and make the final decision to terminate the trial                                                                                                                                                                                                                                      | n/a   |

|                                 |     |                                                                                                                                                                                                                                                                                     |        |
|---------------------------------|-----|-------------------------------------------------------------------------------------------------------------------------------------------------------------------------------------------------------------------------------------------------------------------------------------|--------|
| Harms                           | 22  | Plans for collecting, assessing, reporting, and managing solicited and spontaneously reported adverse events and other unintended effects of trial interventions or trial conduct                                                                                                   | 23     |
| Auditing                        | 23  | Frequency and procedures for auditing trial conduct, if any, and whether the process will be independent from investigators and the sponsor                                                                                                                                         | n/a    |
| <b>Ethics and dissemination</b> |     |                                                                                                                                                                                                                                                                                     |        |
| Research ethics approval        | 24  | Plans for seeking research ethics committee/institutional review board (REC/IRB) approval                                                                                                                                                                                           | 23     |
| Protocol amendments             | 25  | Plans for communicating important protocol modifications (eg, changes to eligibility criteria, outcomes, analyses) to relevant parties (eg, investigators, REC/IRBs, trial participants, trial registries, journals, regulators)                                                    | 23     |
| Consent or assent               | 26a | Who will obtain informed consent or assent from potential trial participants or authorised surrogates, and how (see Item 32)                                                                                                                                                        | 11, 23 |
|                                 | 26b | Additional consent provisions for collection and use of participant data and biological specimens in ancillary studies, if applicable                                                                                                                                               | n/a    |
| Confidentiality                 | 27  | How personal information about potential and enrolled participants will be collected, shared, and maintained in order to protect confidentiality before, during, and after the trial                                                                                                | 19, 24 |
| Declaration of interests        | 28  | Financial and other competing interests for principal investigators for the overall trial and each study site                                                                                                                                                                       | 24     |
| Access to data                  | 29  | Statement of who will have access to the final trial dataset, and disclosure of contractual agreements that limit such access for investigators                                                                                                                                     | 24     |
| Ancillary and post-trial care   | 30  | Provisions, if any, for ancillary and post-trial care, and for compensation to those who suffer harm from trial participation                                                                                                                                                       | n/a    |
| Dissemination policy            | 31a | Plans for investigators and sponsor to communicate trial results to participants, healthcare professionals, the public, and other relevant groups (eg, via publication, reporting in results databases, or other data sharing arrangements), including any publication restrictions | 24-25  |

|                            |     |                                                                                                                                                                                                |     |
|----------------------------|-----|------------------------------------------------------------------------------------------------------------------------------------------------------------------------------------------------|-----|
|                            | 31b | Authorship eligibility guidelines and any intended use of professional writers                                                                                                                 | n/a |
|                            | 31c | Plans, if any, for granting public access to the full protocol, participant-level dataset, and statistical code                                                                                | 25  |
| <b>Appendices</b>          |     |                                                                                                                                                                                                |     |
| Informed consent materials | 32  | Model consent form and other related documentation given to participants and authorised surrogates                                                                                             | n/a |
| Biological specimens       | 33  | Plans for collection, laboratory evaluation, and storage of biological specimens for genetic or molecular analysis in the current trial and for future use in ancillary studies, if applicable | n/a |

\*It is strongly recommended that this checklist be read in conjunction with the SPIRIT 2013 Explanation & Elaboration for important clarification on the items. Amendments to the protocol should be tracked and dated. The SPIRIT checklist is copyrighted by the SPIRIT Group under the Creative Commons "[Attribution-NonCommercial-NoDerivs 3.0 Unported](https://creativecommons.org/licenses/by-nc-nd/3.0/)" license.
